# Supplementary material for: Physical Background of the Disordered Nature of “Mutual Synergetic Folding” Proteins
Source: Int J Mol Sci. 2018 Oct 26;19(11):3340. doi: 10.3390/ijms19113340 (PMC6274838; doi:10.3390/ijms19113340)
Supplement: Supplementary file 1 [file ijms-19-03340-s001.xlsx]

## Sheet: S1. Databases
MFHD	GLHD	GLMD
1arq	1bte	1czt
1b2p	1g8e	1dix
1b8k	1gou	1dy2
1b98	1gyx	1eb6
1bet	1h4x	1f7c
1bfm	1jo0	1gbg
1cmb	1ln0	1gpp
1cz3	1m2d	1hk0
1dbd	1nt3	1id0
1dhm	1nyc	1jm1
1ety	1o7i	1jnx
1f9f	1ob8	1jwq
1gvp	1oqj	1kng
1k3y	1p28	1l2h
1mkh	1pfs	1mf7
1mnt	1pos	1nwa
1ohv	1psr	1pmh
1pd3	1q0a	1qdd
1q2h	1q8b	1qwy
1r6r	1qoa	1r2q
1r8p	1r77	1rut
1rfy	1rlk	1sfs
1uuj	1rmd	1shu
1uwo	1s4k	1uzk
1vcq	1tvd	1w1d
1x93	1u07	1w66
1ygt	1u2h	1x8q
2ay0	1u36	1y93
2aye	1uv7	1ysq
2b9d	1vjq	1z2u
2c9v	1vr9	1zn6
2cpg	1wv9	2a6z
2gsr	1x6i	2af0
2hjd	1xd7	2bmj
2ijk	2b1y	2cak
2k29	2b8m	2cws
2mmv	2b9z	2dru
2odk	2c3v	2fsq
2w1o	2cvi	2g2k
2yal	2dsm	2gzq
3a0e	2ebb	2h5c
3dzw	2euc	2hbw
3frw	2f5y	2jcq
3g1c	2ffg	2jdc
3g5o	2ge7	2jfr
3hs2	2gzv	2ju5
3kor	2i68	2kr7
3kz5	2ic2	2miz
3l32	2ijl	2nlr
3m1e	2iqj	2p0b
3ssi	2iyj	2p39
3wrp	2j73	2p4f
4cfg	2j97	2pu3
4ec7	2jju	2qpw
4efv	2jwk	2r31
4h3o	2ljy	2vy7
4me7	2mh3	2w15
4q14	2mhe	2wf7
4rp3	2nlv	2wfi
4wr4	2nml	2wjr
	2oai	2x5y
	2ofy	2xqo
	2p04	2xtv
	2p13	2zk9
	2pk8	2znr
	2pq3	3a1f
	2prx	3a27
	2qjz	3bjn
	2r2c	3bs2
	2rk5	3bwy
	2utg	3bwz
	2v2k	3c6a
	2v33	3d06
	2v94	3dlc
	2w1r	3eo5
	2w7a	3f4t
	2w8x	3fj2
	2x3g	3ga4
	2z0w	3gp6
	2z14	3hyn
	3aj4	3jud
	3bf4	3l4r
	3bt4	3no3
	3byp	3nr5
	3c0f	3o13
	3cz1	3pm2
	3eip	3qpa
	3eo6	3r6d
	3evi	3ray
	3f5r	3ri8
	3fgx	3rlo
	3fmb	3s9x
	3fx7	3sh4
	3fyb	3smv
	3g1j	3tu8
	3g21	3tvk
	3g27	3tvq
	3g80	3v2i
	3ghj	3v46
	3gla	3vtg
	3h36	3wh1
	3hz4	3wou
	3ic7	3wzs
	3idu	3x2m
	3iuw	3zuc
	3iwf	4a02
	3l1e	4a8u
	3l46	4abl
	3lag	4acj
	3le1	4ann
	3m8j	4as8
	3m92	4bj0
	3m9q	4bji
	3mab	4d0q
	3mn2	4dom
	3n4w	4dt4
	3n8b	4eq8
	3nar	4es7
	3o0l	4etn
	3o1f	4ex6
	3ofg	4g0y
	3op8	4g78
	3pc6	4ga2
	3pd7	4gjz
	3pes	4h7w
	3pgz	4hcj
	3q7t	4i8h
	3s63	4iau
	3sd2	4igi
	3sqf	4ikd
	3t7y	4ink
	3tyr	4jb3
	3u12	4jg2
	3u4v	4jgl
	3vc8	4kqp
	3vk6	4kru
	3vvv	4n67
	3w5z	4nyq
	3x0t	4o6q
	3zii	4oxx
	3zit	4p3k
	3zxc	4p3r
	4aeq	4pqq
	4asv	4q0k
	4bhx	4q68
	4c7a	4qpt
	4cn0	4qpw
	4dgf	4qtq
	4dkk	4rax
	4dwf	4reh
	4ebg	4row
	4efo	4ryo
	4ezf	4uyr
	4fh0	4wh9
	4g4k	4woh
	4gr6	4xdq
	4has	4xez
	4hkg	4xxt
	4hw5	4yg0
	4irg	4z3h
	4j5o	4zgf
	4l8i	5a0n
	4l9d	5aoz
	4low	5b5h
	4mak	5b82
	4mhv	5c10
	4mmg	5c17
	4mz3	5d18
	4npf	5dus
	4oe9	5fqa
	4of6	5g3y
	4oo4	5gm9
	4oyc	5gyj
	4peo	5gyq
	4ps2	5i8t
	4puh	5ima
	4q9b	5j6y
	4rd7	5jnv
	4rgd	5jug
	4ro3	5k9b
	4rt5	5l71
	4u88	5ljm
	4uht	5ly8
	4wwm	5mjr
	4x1j	5ml3
	4xin	5o1x
	4y0g	5tif
	4ye7	5tpk
	4z02	5ufy
	4z4a	5vhg
	4zbh	5xg5
	5aea
	5aq0
	5b0g
	5ces
	5cr8
	5d22
	5f4c
	5fey
	5fs4
	5h3v
	5hsf
	5io8
	5io9
	5iri
	5j4f
	5jmb
	5k6d
	5ko4
	5lbd
	5mkw
	5oho
	5t7a
	5v77
	5vjj
	5vz3
	5wo2
	6b4a

## Sheet: S2. Sequence_composition
	MFHD_mean	GLHD_mean	GLMD_mean	MFHD_std	GLHD_std	GLMD_std
TRP	0.012892	0.012225	0.015628	0.012477	0.012107	0.01256
TYR	0.029463	0.03442	0.039473	0.016387	0.022644	0.017925
PHE	0.034201	0.038204	0.044148	0.023412	0.02103	0.017597
GLN	0.039848	0.042962	0.041269	0.025248	0.024503	0.019282
ASN	0.041698	0.044119	0.051441	0.025333	0.023281	0.023027
THR	0.056315	0.050712	0.057946	0.031527	0.026095	0.023007
SER	0.06793	0.065004	0.071421	0.024783	0.030447	0.0252
MET	0.029022	0.026294	0.020701	0.018118	0.015501	0.01142
ILE	0.052297	0.059478	0.051223	0.025257	0.026843	0.020134
VAL	0.068389	0.067989	0.067056	0.031235	0.02811	0.022772
ALA	0.072543	0.064451	0.072592	0.034755	0.03351	0.03157
LEU	0.09271	0.082969	0.0785	0.034882	0.031803	0.024585
HIS	0.029467	0.036627	0.030809	0.02699	0.026536	0.01997
ASP	0.051595	0.056886	0.057876	0.024741	0.026674	0.018099
ARG	0.064224	0.050499	0.044348	0.029066	0.028304	0.023329
LYS	0.066708	0.066959	0.057563	0.032139	0.033135	0.028823
GLU	0.077544	0.075749	0.058505	0.039665	0.031159	0.0244
PRO	0.034182	0.042445	0.045899	0.021847	0.023748	0.019597
GLY	0.062281	0.061853	0.076189	0.029678	0.027882	0.027656
CYS	0.016216	0.020156	0.017354	0.018023	0.028427	0.018148

## Sheet: S3. PCA
PDB_Type	M	K	G	S	P	Q	F	N	L	R	W	E	V	D	A	I	Y	C	T	H
1CZT_GLMD	0.01875	0.10625	0.0625	0.08125	0.0375	0.04375	0.04375	0.075	0.0625	0.04375	0.04375	0.05625	0.0375	0.025	0.04375	0.09375	0.0375	0.01875	0.05625	0.0125
1DIX_GLMD	0.00480769	0.0432692	0.0865385	0.115385	0.0673077	0.0673077	0.0480769	0.0576923	0.0576923	0.00480769	0.0288462	0.0288462	0.0288462	0.0721154	0.0480769	0.0673077	0.0480769	0.0480769	0.0528846	0.0240385
1DY2_GLMD	0.0166667	0.0388889	0.0666667	0.0722222	0.05	0.0444444	0.0611111	0.0444444	0.0944444	0.0611111	0.0222222	0.0222222	0.0777778	0.0666667	0.0833333	0.0444444	0.0222222	0.0222222	0.0611111	0.0277778
1EB6_GLMD	0	0.0451977	0.0564972	0.0677966	0.039548	0.0508475	0.0169492	0.0508475	0.079096	0.0169492	0	0.0847458	0.0282486	0.0621469	0.152542	0.0169492	0.0677966	0.0338983	0.107345	0.0225989
1F7C_GLMD	0.04329	0.0606061	0.038961	0.0606061	0.04329	0.0519481	0.025974	0.0649351	0.108225	0.0519481	0.00865801	0.0952381	0.0606061	0.030303	0.0562771	0.0822511	0.017316	0.00865801	0.0606061	0.030303
1GBG_GLMD	0.0280374	0.0514019	0.102804	0.0607477	0.0420561	0.0373832	0.046729	0.102804	0.0514019	0.0233645	0.0373832	0.0373832	0.0560748	0.046729	0.0420561	0.0327103	0.0794393	0.00934579	0.0934579	0.0186916
1GPP_GLMD	0.0253165	0.0675105	0.0632911	0.0801688	0.0337553	0.0295359	0.0379747	0.0295359	0.0675105	0.07173	0.00421941	0.0970464	0.0843882	0.0421941	0.0675105	0.0421941	0.0421941	0.0168776	0.0464135	0.0506329
1HK0_GLMD	0.0231214	0.00578035	0.0809249	0.0982659	0.0289017	0.0578035	0.0346821	0.0404624	0.0982659	0.121387	0.0231214	0.0578035	0.0346821	0.0693642	0.0231214	0.0346821	0.0809249	0.0346821	0.017341	0.0346821
1ID0_GLMD	0.0197368	0.0394737	0.0921053	0.0526316	0.0460526	0.0460526	0.0328947	0.0394737	0.0855263	0.0657895	0	0.0986842	0.105263	0.0657895	0.0592105	0.0657895	0.0263158	0.0131579	0.0263158	0.0197368
1JM1_GLMD	0	0.0294118	0.102941	0.0735294	0.0980392	0.0637255	0.0343137	0.0441176	0.0735294	0.0196078	0	0.0147059	0.0735294	0.0637255	0.0784314	0.0637255	0.0686275	0.0343137	0.0490196	0.0147059
1JNX_GLMD	0.0373832	0.0514019	0.0654206	0.0420561	0.0420561	0.046729	0.046729	0.0327103	0.0747664	0.0514019	0.0233645	0.0794393	0.11215	0.0420561	0.0420561	0.046729	0.0280374	0.0280374	0.0747664	0.0327103
1JWQ_GLMD	0.0223464	0.0782123	0.0670391	0.0726257	0.0167598	0.027933	0.0446927	0.0614525	0.0782123	0.0446927	0	0.0670391	0.0949721	0.0502793	0.106145	0.0446927	0.0391061	0	0.0614525	0.0223464
1KNG_GLMD	0.00641026	0.0512821	0.102564	0.0384615	0.0961538	0.0320513	0.0320513	0.0448718	0.102564	0.0641026	0.0192308	0.0448718	0.102564	0.0576923	0.0897436	0.0384615	0.025641	0.0128205	0.0320513	0.00641026
1L2H_GLMD	0.0392157	0.0980392	0.0522876	0.0915033	0.0522876	0.0784314	0.0588235	0.0588235	0.0980392	0.0196078	0.00653595	0.0718954	0.0718954	0.0522876	0.0326797	0.0326797	0.0261438	0.0130719	0.0392157	0.00653595
1MF7_GLMD	0.0154639	0.0721649	0.0618557	0.0618557	0.0463918	0.0463918	0.0773196	0.0515464	0.0670103	0.0721649	0	0.0773196	0.0670103	0.0515464	0.0412371	0.0876289	0.0154639	0.0103093	0.056701	0.0206186
1NWA_GLMD	0.00985222	0.0197044	0.0935961	0.0591133	0.0541872	0.044335	0.044335	0.0344828	0.0591133	0.0738916	0.0197044	0.0591133	0.0492611	0.0541872	0.0689655	0.0492611	0.0394089	0.00985222	0.0738916	0.0837438
1PMH_GLMD	0.0108108	0.0864865	0.102703	0.0594595	0.0378378	0.0432432	0.0756757	0.0648649	0.0486486	0.0324324	0.0216216	0.0648649	0.0864865	0.0756757	0.0540541	0.0540541	0.0378378	0.00540541	0.0324324	0.00540541
1QDD_GLMD	0.00694444	0.0625	0.0694444	0.118056	0.0416667	0.0416667	0.0486111	0.0625	0.0555556	0.0277778	0.0416667	0.0555556	0.0694444	0.0555556	0.0625	0.0277778	0.0486111	0.0416667	0.0486111	0.0138889
1QWY_GLMD	0.0171821	0.0309278	0.109966	0.103093	0.0343643	0.0859107	0.0137457	0.113402	0.0171821	0.0137457	0.0137457	0.0137457	0.04811	0.0549828	0.0859107	0.0171821	0.0962199	0.00343643	0.0790378	0.04811
1R2Q_GLMD	0.0235294	0.0764706	0.0470588	0.0705882	0.0176471	0.0588235	0.0588235	0.0588235	0.0823529	0.0352941	0.0117647	0.0647059	0.0705882	0.0470588	0.117647	0.0529412	0.0294118	0.0117647	0.0529412	0.0117647
1RUT_GLMD	0.0265957	0.0265957	0.143617	0.101064	0.0212766	0.0265957	0.037234	0.0478723	0.0851064	0.0638298	0.0106383	0.0425532	0.0319149	0.0638298	0.0585106	0.0478723	0.0319149	0.0638298	0.0425532	0.0265957
1SFS_GLMD	0.00833333	0.0291667	0.0666667	0.0375	0.0583333	0.0416667	0.0416667	0.0541667	0.0666667	0.0708333	0.0291667	0.0458333	0.0958333	0.05	0.129167	0.0333333	0.0541667	0.0166667	0.0416667	0.0291667
1SHU_GLMD	0.00549451	0.0714286	0.0879121	0.0989011	0.0274725	0.0549451	0.0494505	0.0274725	0.104396	0.043956	0.00549451	0.0659341	0.0714286	0.043956	0.0769231	0.0879121	0.0274725	0.0164835	0.0274725	0.00549451
1UZK_GLMD	0.00617284	0.0246914	0.111111	0.0555556	0.0802469	0.0185185	0.0246914	0.0679012	0.0555556	0.0432099	0.00617284	0.0617284	0.0555556	0.0740741	0.0246914	0.0555556	0.0308642	0.123457	0.0802469	0
1W1D_GLMD	0.013245	0.0728477	0.0596026	0.0463576	0.0662252	0.0662252	0.0463576	0.0596026	0.112583	0.0662252	0.0264901	0.0728477	0.0529801	0.0529801	0.0397351	0.0331126	0.0397351	0.00662252	0.0264901	0.0397351
1W66_GLMD	0.00431034	0.012931	0.103448	0.0474138	0.0560345	0.0215517	0.00862069	0.00862069	0.103448	0.0862069	0.012931	0.0387931	0.116379	0.0689655	0.133621	0.0431034	0.0172414	0.0215517	0.0689655	0.0258621
1X8Q_GLMD	0.00543478	0.11413	0.0543478	0.0597826	0.0163043	0.0163043	0.0380435	0.0706522	0.0869565	0.0108696	0.00543478	0.0326087	0.0706522	0.0978261	0.119565	0.0163043	0.0706522	0.0217391	0.076087	0.0163043
1Y93_GLMD	0.0251572	0.0440252	0.119497	0.0566038	0.0377358	0.0125786	0.0628931	0.0440252	0.0566038	0.0440252	0.0188679	0.0251572	0.0566038	0.0880503	0.0754717	0.0691824	0.0440252	0	0.0628931	0.0566038
1YSQ_GLMD	0.0362694	0.0310881	0.0673575	0.0725389	0.0466321	0.0259067	0.0259067	0.0362694	0.0984456	0.0518135	0.00518135	0.0777202	0.0414508	0.0414508	0.0932642	0.0880829	0.0362694	0.0103627	0.0621762	0.0518135
1Z2U_GLMD	0.02	0.0466667	0.0533333	0.0666667	0.106667	0.0533333	0.04	0.0333333	0.0933333	0.0533333	0.02	0.0333333	0.0333333	0.0666667	0.06	0.0733333	0.04	0.0266667	0.0533333	0.0266667
1ZN6_GLMD	0.030837	0.0440529	0.0572687	0.0352423	0.0748899	0.0220264	0.0264317	0.0220264	0.061674	0.0837004	0.0396476	0.0572687	0.030837	0.0792952	0.145374	0.0396476	0.0396476	0.00881057	0.0528634	0.0484581
2A6Z_GLMD	0.0135135	0.0585586	0.0900901	0.0990991	0.0405405	0.0720721	0.0540541	0.0810811	0.0855856	0.0405405	0.018018	0.0315315	0.0720721	0.0810811	0.027027	0.036036	0.036036	0.00900901	0.0540541	0
2AF0_GLMD	0.0136986	0.10274	0.0205479	0.0821918	0.0410959	0.0616438	0.0821918	0.0410959	0.0890411	0.0273973	0.0136986	0.116438	0.00684932	0.0410959	0.0890411	0.0479452	0.0410959	0.0273973	0.0547945	0
2BMJ_GLMD	0.0168539	0.0449438	0.0842697	0.0955056	0.0168539	0.0617978	0.0337079	0.011236	0.117978	0.0842697	0.00561798	0.0674157	0.0842697	0.0505618	0.0955056	0.0280899	0.0280899	0.0168539	0.0393258	0.0168539
2CAK_GLMD	0.0194805	0.0844156	0.11039	0.0324675	0.0909091	0.025974	0.0649351	0.025974	0.0324675	0	0.012987	0.012987	0.11039	0.0519481	0.0779221	0.0519481	0.038961	0.00649351	0.116883	0.0324675
2CWS_GLMD	0.0337553	0.0590717	0.101266	0.0886076	0.0379747	0.0421941	0.0295359	0.0632911	0.07173	0.0168776	0.021097	0.021097	0.0590717	0.07173	0.0675105	0.0337553	0.0464135	0	0.0886076	0.0464135
2DRU_GLMD	0.0388889	0.0777778	0.0333333	0.0611111	0.0333333	0.05	0.0277778	0.0611111	0.0888889	0.05	0.0222222	0.0833333	0.0833333	0.0444444	0.0333333	0.0333333	0.05	0.0222222	0.0833333	0.0222222
2FSQ_GLMD	0.037037	0.0246914	0.0452675	0.0658436	0.0823045	0.0329218	0.0658436	0.0164609	0.0864198	0.0658436	0.0164609	0.0658436	0.0740741	0.0699588	0.0699588	0.0329218	0.0288066	0.0123457	0.0658436	0.0411523
2G2K_GLMD	0.0294118	0.135294	0.0764706	0.0352941	0.0529412	0.0294118	0.0352941	0.0882353	0.0647059	0.0411765	0	0.0588235	0.0705882	0.0588235	0.0352941	0.0411765	0.0352941	0.0352941	0.0529412	0.0235294
2GZQ_GLMD	0.035	0.08	0.08	0.055	0.065	0.015	0.04	0.06	0.06	0.055	0.01	0.06	0.075	0.055	0.02	0.08	0.04	0.02	0.04	0.055
2H5C_GLMD	0.010101	0.010101	0.161616	0.10101	0.020202	0.0454545	0.030303	0.0656566	0.0505051	0.0606061	0.010101	0.020202	0.0959596	0.010101	0.121212	0.040404	0.020202	0.030303	0.0909091	0.00505051
2HBW_GLMD	0.012766	0.0425532	0.106383	0.0893617	0.0425532	0.0808511	0.0255319	0.0212766	0.106383	0.0297872	0.012766	0.0425532	0.0638298	0.0510638	0.0893617	0.0425532	0.0553191	0.0255319	0.0425532	0.0170213
2JCQ_GLMD	0.0194805	0.0324675	0.0584416	0.0714286	0.0454545	0.025974	0.038961	0.0714286	0.0454545	0.0519481	0	0.0519481	0.0649351	0.0649351	0.0714286	0.0649351	0.0519481	0.038961	0.0974026	0.0324675
2JDC_GLMD	0.0273973	0.0616438	0.0958904	0.0616438	0.0410959	0.0547945	0.0342466	0.0205479	0.10274	0.0684932	0.00684932	0.0890411	0.0205479	0.0273973	0.0753425	0.0684932	0.0547945	0.0136986	0.0342466	0.0410959
2JFR_GLMD	0.0128205	0.0042735	0.115385	0.0470085	0.0512821	0.034188	0.025641	0.025641	0.102564	0.0598291	0.0042735	0.0470085	0.0897436	0.0897436	0.136752	0.042735	0.00854701	0.00854701	0.0598291	0.034188
2JU5_GLMD	0.0324675	0.0779221	0.0649351	0.0584416	0.038961	0.0909091	0.0519481	0.025974	0.0714286	0.0454545	0.0194805	0.0779221	0.0454545	0.0324675	0.103896	0.0324675	0.0194805	0.012987	0.0194805	0.0779221
2KR7_GLMD	0.0198675	0.0529801	0.0662252	0.0662252	0.0264901	0.0662252	0.0463576	0.0331126	0.0728477	0.0264901	0.00662252	0.145695	0.0794702	0.0397351	0.0728477	0.0927152	0.0331126	0	0.0331126	0.0198675
2MIZ_GLMD	0.04	0.075	0.045	0.095	0.075	0.01	0.025	0.09	0.08	0.06	0.015	0.06	0.075	0.055	0.03	0.01	0.045	0.02	0.08	0.015
2NLR_GLMD	0.00854701	0.0042735	0.123932	0.0940171	0.0726496	0.034188	0.042735	0.0555556	0.0299145	0.0384615	0.034188	0.025641	0.0940171	0.0641026	0.0811966	0.0384615	0.0299145	0.017094	0.106838	0.0042735
2P0B_GLMD	0.0306748	0.0613497	0.0368098	0.0613497	0.0920245	0.0797546	0.0184049	0.0613497	0.0490798	0.0368098	0.00613497	0.0429448	0.0736196	0.0674847	0.0674847	0.0184049	0.0122699	0.0613497	0.0552147	0.0674847
2P39_GLMD	0.0258065	0.0129032	0.0774194	0.0774194	0.0774194	0.0387097	0.0580645	0.0580645	0.083871	0.083871	0.00645161	0.0258065	0.0387097	0.0322581	0.0516129	0.0580645	0.0645161	0.0129032	0.0451613	0.0709677
2P4F_GLMD	0.0234114	0.113712	0.0401338	0.0702341	0.0334448	0.0602007	0.0301003	0.0635452	0.113712	0.0301003	0.0100334	0.0769231	0.0568562	0.0702341	0.0602007	0.0367893	0.0301003	0.00334448	0.0334448	0.0434783
2PU3_GLMD	0.014218	0.104265	0.0663507	0.0616114	0.042654	0.07109	0.0521327	0.0616114	0.0331754	0.0663507	0.0331754	0.0616114	0.0473934	0.0331754	0.0805687	0.0379147	0.0473934	0.0379147	0.028436	0.0189573
2QPW_GLMD	0.0134228	0.0805369	0.0738255	0.0268456	0.0805369	0.0201342	0.0268456	0.0738255	0.0805369	0.0402685	0.0402685	0.100671	0.0805369	0.033557	0.0604027	0.0469799	0.0469799	0.0134228	0.0536913	0.00671141
2R31_GLMD	0.0167364	0.0209205	0.0669456	0.0460251	0.0669456	0.0334728	0.0209205	0.0083682	0.121339	0.083682	0.0334728	0.083682	0.0585774	0.0627615	0.154812	0.0460251	0.0083682	0	0.041841	0.0251046
2VY7_GLMD	0.0318471	0.0509554	0.0764331	0.0764331	0.0573248	0.0636943	0.0509554	0.0573248	0.0828025	0.0636943	0.0191083	0.0509554	0.0764331	0.0318471	0.0382166	0.0636943	0.0254777	0	0.0828025	0
2W15_GLMD	0.019802	0.049505	0.0594059	0.0891089	0.029703	0.029703	0.029703	0.0693069	0.0891089	0.0544554	0.0148515	0.0445545	0.0841584	0.0544554	0.0544554	0.0445545	0.0346535	0.029703	0.0594059	0.0594059
2WF7_GLMD	0.0135747	0.0859729	0.0633484	0.0588235	0.0452489	0.040724	0.040724	0.0316742	0.0995475	0.0316742	0.00904977	0.0678733	0.0678733	0.0904977	0.117647	0.0769231	0.0226244	0	0.0226244	0.0135747
2WFI_GLMD	0.0167598	0.0726257	0.111732	0.0614525	0.0391061	0.0446927	0.0893855	0.0446927	0.0502793	0.0502793	0	0.0726257	0.0782123	0.0446927	0.0446927	0.0446927	0.0111732	0.0391061	0.0502793	0.0335196
2WJR_GLMD	0.0186916	0.0514019	0.0654206	0.0700935	0.0186916	0.0420561	0.0280374	0.0794393	0.0607477	0.0654206	0.046729	0.0373832	0.0560748	0.0841121	0.0560748	0.0327103	0.088785	0	0.0654206	0.0327103
2X5Y_GLMD	0.017341	0.121387	0.0289017	0.0924855	0.0404624	0.0346821	0.0693642	0.0520231	0.0462428	0.017341	0.00578035	0.0809249	0.0751445	0.0462428	0.0404624	0.0635838	0.0693642	0.017341	0.0404624	0.0404624
2XQO_GLMD	0.0329218	0.037037	0.0781893	0.0781893	0.0411523	0.0164609	0.0493827	0.0493827	0.0411523	0.0534979	0.0246914	0.0617284	0.0493827	0.0617284	0.0987654	0.0452675	0.0534979	0.00411523	0.0534979	0.0699588
2XTV_GLMD	0.0555556	0.0222222	0.111111	0.0444444	0.0277778	0.0333333	0.0722222	0.0166667	0.138889	0.0277778	0.0611111	0.0222222	0.0833333	0.0277778	0.0944444	0.0722222	0.0333333	0.00555556	0.0277778	0.0222222
2ZK9_GLMD	0.0108108	0.0378378	0.0594595	0.145946	0.0486486	0.0162162	0.0324324	0.0864865	0.0648649	0.0324324	0.0108108	0.0162162	0.0756757	0.0378378	0.0810811	0.0432432	0.0594595	0.0594595	0.0702703	0.0108108
2ZNR_GLMD	0.0224719	0.0674157	0.0617978	0.0449438	0.0505618	0.0337079	0.0393258	0.0280899	0.117978	0.0280899	0.00561798	0.0617978	0.0730337	0.0505618	0.0393258	0.0674157	0.011236	0.0505618	0.0730337	0.0730337
3A1F_GLMD	0.0107527	0.0591398	0.0698925	0.0698925	0.0322581	0.0376344	0.0698925	0.0698925	0.0860215	0.0268817	0.0268817	0.0698925	0.0591398	0.0430108	0.0698925	0.0537634	0.0430108	0.016129	0.0537634	0.0322581
3A27_GLMD	0.0257353	0.117647	0.0551471	0.0294118	0.0294118	0.0147059	0.0404412	0.0367647	0.0735294	0.0441176	0.00735294	0.0882353	0.0845588	0.0441176	0.0477941	0.0919118	0.0588235	0.0110294	0.0441176	0.0551471
3BJN_GLMD	0.0424242	0.0484848	0.0606061	0.109091	0.0424242	0.0666667	0.0181818	0.0181818	0.0848485	0.0727273	0.00606061	0.0606061	0.0787879	0.0242424	0.115152	0.0484848	0.0363636	0.0181818	0.0242424	0.0242424
3BS2_GLMD	0.00675676	0.0337838	0.108108	0.108108	0.027027	0.0675676	0.0202703	0.0743243	0.0608108	0.027027	0.0135135	0.0337838	0.0608108	0.0472973	0.0608108	0.027027	0.0472973	0.0405405	0.114865	0.0202703
3BWY_GLMD	0.0233645	0.0654206	0.0700935	0.0373832	0.0420561	0.046729	0.0233645	0.0233645	0.11215	0.0420561	0.00934579	0.0654206	0.0841121	0.0794393	0.0794393	0.0560748	0.0373832	0.0327103	0.0420561	0.0280374
3BWZ_GLMD	0.0220994	0.0552486	0.0552486	0.0994475	0.038674	0.0331492	0.0331492	0.0607735	0.0662983	0.0165746	0.00552486	0.0441989	0.0883978	0.0662983	0.0828729	0.0773481	0.0276243	0.00552486	0.0883978	0.0331492
3C6A_GLMD	0.0387931	0.0689655	0.0689655	0.0862069	0.0258621	0.0301724	0.0474138	0.0301724	0.0862069	0.0301724	0.00862069	0.0689655	0.0517241	0.0689655	0.0517241	0.0732759	0.0431034	0.0172414	0.0517241	0.0517241
3D06_GLMD	0.03	0.035	0.07	0.1	0.07	0.035	0.025	0.045	0.07	0.085	0.005	0.055	0.075	0.04	0.035	0.03	0.04	0.05	0.07	0.035
3DLC_GLMD	0.0182648	0.0776256	0.0821918	0.0730594	0.0228311	0.0273973	0.0547945	0.0730594	0.0502283	0.0456621	0.0136986	0.0730594	0.0365297	0.0730594	0.0684932	0.146119	0.0228311	0.00456621	0.0273973	0.00913242
3EO5_GLMD	0.0175439	0.0175439	0.122807	0.0116959	0.0760234	0.0292398	0.0116959	0.0526316	0.0350877	0.0877193	0.0292398	0.0818713	0.128655	0.0409357	0.122807	0.0350877	0.0175439	0.0116959	0.0643275	0.00584795
3F4T_GLMD	0.0176991	0.119469	0.0309735	0.0486726	0.0353982	0.0309735	0.0486726	0.079646	0.115044	0.0176991	0.00442478	0.039823	0.0353982	0.0707965	0.0575221	0.0840708	0.0619469	0.00884956	0.0309735	0.0619469
3FJ2_GLMD	0.0322581	0.0752688	0.0591398	0.0806452	0.0215054	0.0752688	0.0752688	0.0430108	0.0913978	0.016129	0.0107527	0.0913978	0.0430108	0.0268817	0.016129	0.0591398	0.0483871	0	0.0645161	0.0698925
3GA4_GLMD	0.0168539	0.0393258	0.0337079	0.0617978	0.0561798	0.0674157	0.0561798	0.0730337	0.0898876	0.0168539	0.00561798	0.0449438	0.0842697	0.0561798	0.0561798	0.0505618	0.0393258	0.011236	0.0617978	0.0786517
3GP6_GLMD	0.0306748	0.0306748	0.0920245	0.0245399	0.0613497	0.0306748	0.0613497	0.0674847	0.0674847	0.0490798	0.0736196	0.0552147	0.0306748	0.0490798	0.0797546	0.0368098	0.0674847	0	0.0674847	0.0245399
3HYN_GLMD	0.037037	0.0793651	0.042328	0.0952381	0.042328	0.010582	0.047619	0.0952381	0.0687831	0.037037	0.015873	0.042328	0.047619	0.0846561	0.0582011	0.0582011	0.0634921	0.00529101	0.047619	0.021164
3JUD_GLMD	0.0130719	0.00653595	0.0784314	0.0392157	0.0980392	0.0392157	0.0392157	0.0261438	0.111111	0.104575	0.0130719	0.0718954	0.0718954	0.0457516	0.0915033	0.0130719	0.0457516	0.0130719	0.0326797	0.0457516
3L4R_GLMD	0.0235294	0.0470588	0.0647059	0.0823529	0.0294118	0.0470588	0.0352941	0.0411765	0.111765	0.0352941	0.0176471	0.0647059	0.0529412	0.1	0.0470588	0.0470588	0.0294118	0.0176471	0.0235294	0.0823529
3NO3_GLMD	0.0336134	0.092437	0.0504202	0.0672269	0.0294118	0.0378151	0.0252101	0.0420168	0.105042	0.0504202	0.012605	0.0756303	0.0588235	0.0798319	0.0462185	0.0504202	0.0378151	0.0168067	0.0546218	0.0336134
3NR5_GLMD	0.00609756	0.0487805	0.0243902	0.128049	0.0365854	0.0121951	0.0792683	0.054878	0.0914634	0.054878	0.0182927	0.0731707	0.0426829	0.0731707	0.0487805	0.0487805	0.0426829	0.0365854	0.0304878	0.0487805
3O13_GLMD	0.010101	0.106061	0.0707071	0.0858586	0.010101	0.040404	0.0252525	0.0606061	0.0707071	0.0353535	0	0.0707071	0.0757576	0.0757576	0.010101	0.0656566	0.0505051	0	0.111111	0.0252525
3PM2_GLMD	0.0520231	0.0867052	0.0578035	0.0635838	0.0693642	0.017341	0.0404624	0.0404624	0.0751445	0.017341	0.0115607	0.0635838	0.0346821	0.0520231	0.0867052	0.0578035	0.017341	0.0751445	0.0635838	0.017341
3QPA_GLMD	0.00507614	0.0304569	0.126904	0.0558376	0.0456853	0.0253807	0.0304569	0.0507614	0.0862944	0.0659898	0.00507614	0.0304569	0.0456853	0.0609137	0.137056	0.0659898	0.0304569	0.0203046	0.071066	0.00507614
3R6D_GLMD	0.0226244	0.0452489	0.0678733	0.0588235	0.0452489	0.040724	0.0361991	0.0452489	0.081448	0.0542986	0.00904977	0.0723982	0.0723982	0.0452489	0.0859729	0.0769231	0.040724	0	0.0723982	0.0271493
3RAY_GLMD	0.021097	0.0632911	0.0632911	0.0801688	0.0590717	0.0506329	0.0421941	0.0337553	0.0590717	0.0801688	0.021097	0.0886076	0.0801688	0.0675105	0.0337553	0.0548523	0.0295359	0.021097	0.0253165	0.0253165
3RI8_GLMD	0.0162162	0	0.102703	0.156757	0.0162162	0.0324324	0.0486486	0.0702703	0.0216216	0.0162162	0.027027	0.0432432	0.0810811	0.0432432	0.0756757	0.027027	0.0918919	0.0108108	0.108108	0.0108108
3RLO_GLMD	0.0196078	0.102941	0.0539216	0.0588235	0.0294118	0.0245098	0.0539216	0.0686275	0.0588235	0.0392157	0	0.0833333	0.107843	0.0392157	0.0637255	0.0588235	0.0245098	0.0196078	0.0686275	0.0245098
3S9X_GLMD	0.0188679	0.0440252	0.0503145	0.100629	0.0125786	0.0566038	0.0566038	0.0314465	0.0880503	0.0440252	0.0251572	0.119497	0.0691824	0.0440252	0.0566038	0.0377358	0.0566038	0.0377358	0.0188679	0.0314465
3SH4_GLMD	0	0.0153846	0.14359	0.0769231	0.0769231	0.0461538	0.0358974	0.025641	0.0923077	0.0666667	0.0102564	0.0615385	0.0820513	0.0512821	0.0820513	0.0307692	0.0205128	0.0102564	0.0410256	0.0307692
3SMV_GLMD	0.0208333	0.0708333	0.0666667	0.0416667	0.0458333	0.0333333	0.0458333	0.05	0.0875	0.0416667	0.0166667	0.075	0.0458333	0.0666667	0.0958333	0.0541667	0.0416667	0.00416667	0.0625	0.0333333
3TU8_GLMD	0.0238095	0.0285714	0.1	0.0904762	0.047619	0.0857143	0.0285714	0.0380952	0.0952381	0.0428571	0.0380952	0.0428571	0.052381	0.052381	0.0761905	0.0333333	0.0380952	0.0047619	0.0666667	0.0142857
3TVK_GLMD	0.0223464	0.0167598	0.0670391	0.027933	0.0223464	0.0223464	0.027933	0.0558659	0.0949721	0.0893855	0.00558659	0.0726257	0.0837989	0.0726257	0.0726257	0.0726257	0.0391061	0.0167598	0.0558659	0.0614525
3TVQ_GLMD	0.035503	0.0295858	0.0532544	0.0295858	0.0532544	0.0295858	0.0414201	0.0473373	0.0591716	0.0946746	0.035503	0.0828402	0.0710059	0.0650888	0.100592	0.035503	0.0177515	0	0.0769231	0.0414201
3V2I_GLMD	0.036036	0.045045	0.103604	0.036036	0.0540541	0.0405405	0.027027	0.0315315	0.0990991	0.0675676	0.00900901	0.0675676	0.0585586	0.0405405	0.117117	0.045045	0.0225225	0	0.0315315	0.0675676
3V46_GLMD	0.00588235	0.0647059	0.0470588	0.0705882	0.0647059	0.0470588	0.0705882	0.0705882	0.0588235	0.0705882	0.0294118	0.0588235	0.0823529	0.0411765	0.0294118	0.0764706	0.0411765	0.00588235	0.0411765	0.0235294
3VTG_GLMD	0.025	0.035	0.085	0.1	0.035	0.03	0.035	0.09	0.035	0.075	0.02	0.045	0.05	0.04	0.05	0.09	0.06	0.03	0.045	0.025
3WH1_GLMD	0.0194175	0.0145631	0.106796	0.0728155	0.0582524	0.0728155	0.0485437	0.0679612	0.0728155	0.038835	0.0291262	0.0339806	0.0339806	0.0582524	0.0728155	0.038835	0.0533981	0.0291262	0.0728155	0.00485437
3WOU_GLMD	0.00483092	0.0531401	0.115942	0.0628019	0.057971	0.0241546	0.0531401	0.0386473	0.0434783	0.0628019	0.0144928	0.0289855	0.0483092	0.0628019	0.0772947	0.0386473	0.0386473	0.0772947	0.0966184	0
3WZS_GLMD	0.0122699	0.0613497	0.0429448	0.0797546	0.0306748	0.0184049	0.0552147	0.0552147	0.110429	0.0552147	0.00613497	0.0736196	0.0797546	0.110429	0.0858896	0.0429448	0.0245399	0	0.0429448	0.0122699
3X2M_GLMD	0.0111111	0.0222222	0.166667	0.0888889	0.0666667	0.0611111	0.0611111	0.05	0.0388889	0.00555556	0.0166667	0.0222222	0.0333333	0.0333333	0.105556	0.0166667	0.0222222	0.0555556	0.1	0.0222222
3ZUC_GLMD	0.0130719	0.0457516	0.0718954	0.104575	0.0261438	0.0392157	0.0588235	0.0784314	0.0457516	0.0130719	0.0326797	0.0326797	0.0522876	0.0588235	0.104575	0.0392157	0.0522876	0.00653595	0.111111	0.0130719
4A02_GLMD	0	0.060241	0.0903614	0.0542169	0.0542169	0.0542169	0.0361446	0.0843373	0.0361446	0.0301205	0.0361446	0.0301205	0.060241	0.0542169	0.0843373	0.0843373	0.0361446	0	0.0903614	0.0240964
4A8U_GLMD	0.00628931	0.0943396	0.0880503	0.0691824	0.0503145	0.0125786	0.0503145	0.0628931	0.0566038	0.0188679	0	0.0880503	0.0754717	0.0503145	0.0754717	0.081761	0.0440252	0	0.0503145	0.0251572
4ABL_GLMD	0.0163934	0.0928962	0.0819672	0.103825	0.0218579	0.0601093	0.0382514	0.0546448	0.0382514	0.0218579	0	0.0601093	0.103825	0.0491803	0.0710383	0.0928962	0.0273224	0.0273224	0.0273224	0.010929
4ACJ_GLMD	0.0359281	0.0598802	0.107784	0.0778443	0.0479042	0.0299401	0.0958084	0.0299401	0.0958084	0.0179641	0.0239521	0.0778443	0.0179641	0.0718563	0.0479042	0.0479042	0.0359281	0.00598802	0.0479042	0.0239521
4ANN_GLMD	0.0139535	0.0697674	0.0232558	0.0372093	0.0465116	0.0465116	0.0604651	0.0511628	0.125581	0.0465116	0	0.0930233	0.0511628	0.0697674	0.0651163	0.0465116	0.0465116	0.00465116	0.0697674	0.0325581
4AS8_GLMD	0.0204082	0.0816327	0.0897959	0.0367347	0.0408163	0.0326531	0.0489796	0.0489796	0.0857143	0.0244898	0.00816327	0.0653061	0.0693878	0.077551	0.044898	0.0530612	0.0367347	0.00816327	0.0693878	0.0571429
4BJ0_GLMD	0	0.00568182	0.0909091	0.0397727	0.0511364	0.0397727	0.0511364	0.0738636	0.0568182	0.0284091	0.0113636	0.0681818	0.125	0.0454545	0.0909091	0.0511364	0.0284091	0	0.0909091	0.0511364
4BJI_GLMD	0.0232558	0.0744186	0.0604651	0.0511628	0.055814	0.0232558	0.0418605	0.0325581	0.0976744	0.0744186	0.0186047	0.0651163	0.0604651	0.0511628	0.055814	0.0372093	0.055814	0.0186047	0.0744186	0.027907
4D0Q_GLMD	0.0118343	0.106509	0.0650888	0.0828402	0.0177515	0.035503	0.0236686	0.0295858	0.0650888	0.035503	0.0295858	0.0769231	0.0532544	0.0769231	0.0769231	0.0710059	0.0177515	0	0.0769231	0.0473373
4DOM_GLMD	0.0283688	0.0780142	0.0141844	0.0780142	0.0567376	0.0496454	0.0567376	0.0141844	0.0921986	0.070922	0.0212766	0.0496454	0.0638298	0.0638298	0.0496454	0.0638298	0.035461	0.0567376	0.0496454	0.0070922
4DT4_GLMD	0.035503	0.0236686	0.0946746	0.100592	0.0532544	0.0236686	0.0532544	0.0295858	0.100592	0.035503	0	0.0769231	0.0591716	0.0710059	0.0710059	0.0473373	0.00591716	0	0.0532544	0.0650888
4EQ8_GLMD	0.0246914	0.0493827	0.0987654	0.0925926	0.037037	0.0555556	0.0123457	0.0493827	0.0802469	0.0432099	0.0246914	0.0246914	0.0802469	0.0432099	0.111111	0.0246914	0.0432099	0.037037	0.0246914	0.0432099
4ES7_GLMD	0.0447761	0.0547264	0.0995025	0.0845771	0.0298507	0.039801	0.0298507	0.0298507	0.0547264	0.0547264	0.0199005	0.0646766	0.0547264	0.039801	0.0497512	0.0547264	0.039801	0.0149254	0.0845771	0.0547264
4ETN_GLMD	0.0434783	0.0543478	0.0869565	0.0978261	0.0326087	0.0434783	0.0380435	0.0271739	0.0869565	0.0597826	0	0.0652174	0.0597826	0.0434783	0.076087	0.0434783	0.0163043	0.00543478	0.048913	0.0706522
4EX6_GLMD	0.0295359	0.0126582	0.118143	0.0464135	0.0675105	0	0.0126582	0	0.092827	0.0759494	0	0.0506329	0.0970464	0.0675105	0.168776	0.0379747	0.0126582	0.00421941	0.0590717	0.0464135
4G0Y_GLMD	0.0340136	0.0816327	0.0612245	0.0612245	0.0408163	0.0544218	0.0272109	0.0816327	0.0952381	0.0408163	0.00680272	0.047619	0.0952381	0.0340136	0.047619	0.0612245	0.0272109	0.0408163	0.047619	0.0136054
4G78_GLMD	0.0328947	0.0657895	0.0460526	0.0657895	0.0131579	0.111842	0.0592105	0.0592105	0.105263	0.0526316	0	0.0526316	0.0526316	0.0657895	0.0723684	0.0263158	0.0197368	0.0263158	0.0328947	0.0394737
4GA2_GLMD	0.00666667	0.106667	0.0533333	0.0533333	0.0466667	0.0333333	0.0266667	0.0266667	0.106667	0.0666667	0.00666667	0.0933333	0.06	0.06	0.08	0.0333333	0.0733333	0.0266667	0.0333333	0.00666667
4GJZ_GLMD	0.012766	0.0382979	0.0510638	0.0765957	0.0808511	0.0680851	0.0510638	0.0255319	0.093617	0.0425532	0.0297872	0.0723404	0.0723404	0.0510638	0.0340426	0.0638298	0.0425532	0.0170213	0.0382979	0.0382979
4H7W_GLMD	0.0207254	0.0414508	0.0362694	0.0518135	0.0362694	0.0621762	0.0829016	0.0259067	0.124352	0.0569948	0.015544	0.0725389	0.0984456	0.0414508	0.0569948	0.0207254	0.0259067	0.015544	0.0621762	0.0518135
4HCJ_GLMD	0.0282486	0.0564972	0.101695	0.0903955	0.00564972	0.0282486	0.0508475	0.0847458	0.0677966	0.0112994	0.0112994	0.0564972	0.107345	0.0508475	0.079096	0.0734463	0.0169492	0.0112994	0.0564972	0.0112994
4I8H_GLMD	0.00896861	0.0627803	0.112108	0.152466	0.0358744	0.044843	0.0134529	0.0717489	0.0627803	0.00896861	0.0179372	0.0179372	0.0762332	0.0269058	0.0627803	0.0672646	0.044843	0.0538117	0.044843	0.0134529
4IAU_GLMD	0.0245399	0.0429448	0.104294	0.0981595	0.0429448	0.0490798	0.0490798	0.0490798	0.0736196	0.0552147	0.0184049	0.0368098	0.0674847	0.0552147	0.0674847	0.0368098	0.0429448	0	0.0736196	0.0122699
4IGI_GLMD	0.00985222	0.0197044	0.103448	0.08867	0.0640394	0.0492611	0.0394089	0.0246305	0.103448	0.0689655	0	0.0591133	0.103448	0.0541872	0.0541872	0.0837438	0.00985222	0	0.0591133	0.00492611
4IKD_GLMD	0.0174419	0.0406977	0.0406977	0.104651	0.0290698	0.0872093	0.0465116	0.0348837	0.0930233	0.0755814	0.0174419	0.0872093	0.0872093	0.0290698	0.0406977	0.0290698	0.0232558	0.0174419	0.0465116	0.0523256
4INK_GLMD	0.0195122	0.097561	0.102439	0.0878049	0.0536585	0.0195122	0.0390244	0.0829268	0.0292683	0.0146341	0.00487805	0.0585366	0.097561	0.0390244	0.0536585	0.0682927	0.0439024	0	0.0682927	0.0195122
4JB3_GLMD	0.0219298	0.0614035	0.0745614	0.0701754	0.0307018	0.0394737	0.0657895	0.0394737	0.109649	0.0307018	0.0131579	0.0745614	0.0482456	0.0833333	0.0394737	0.0570175	0.0350877	0.0131579	0.0438596	0.0482456
4JG2_GLMD	0.00480769	0.0721154	0.0865385	0.0625	0.0432692	0.0240385	0.0384615	0.0817308	0.0480769	0.0432692	0.00961538	0.0576923	0.0721154	0.0721154	0.0865385	0.0576923	0.0384615	0.00961538	0.0480769	0.0432692
4JGL_GLMD	0.0414201	0.0769231	0.106509	0.035503	0.0532544	0.0177515	0.0532544	0.0591716	0.0473373	0.0236686	0	0.0650888	0.0414201	0.0710059	0.0828402	0.0532544	0.0710059	0.0295858	0.0591716	0.0118343
4KQP_GLMD	0.0301724	0.0948276	0.0818966	0.0818966	0.0344828	0.0387931	0.0560345	0.0689655	0.0560345	0.00862069	0.00862069	0.0301724	0.0344828	0.0905172	0.0948276	0.0646552	0.0517241	0	0.0646552	0.00862069
4KRU_GLMD	0.0174672	0.0655022	0.0873362	0.0611354	0.00873362	0.0218341	0.0567686	0.126638	0.0480349	0.0218341	0.0174672	0.069869	0.0873362	0.0524017	0.0567686	0.0480349	0.0524017	0.0131004	0.0480349	0.0393013
4N67_GLMD	0.0440529	0.0837004	0.0484581	0.0352423	0.0528634	0.0484581	0.0660793	0.0484581	0.0748899	0.061674	0.00881057	0.0748899	0.0220264	0.030837	0.0969163	0.0352423	0.030837	0.0132159	0.0572687	0.0660793
4NYQ_GLMD	0.00609756	0.0731707	0.0487805	0.054878	0.0670732	0.0182927	0.0365854	0.0487805	0.0792683	0.0365854	0.00609756	0.054878	0.0731707	0.0609756	0.0731707	0.0487805	0.0914634	0.0243902	0.0609756	0.0365854
4O6Q_GLMD	0.0108696	0.0217391	0.125	0.13587	0.0380435	0.0380435	0.0380435	0.0326087	0.0923913	0.0108696	0.0163043	0.00543478	0.0543478	0.0869565	0.125	0.0380435	0.0380435	0	0.0652174	0.0271739
4OXX_GLMD	0.0185185	0.0123457	0.0987654	0.0493827	0.0246914	0.0185185	0.0432099	0.0185185	0.0925926	0.0308642	0.00617284	0.0555556	0.0432099	0.0740741	0.17284	0.0308642	0.0246914	0.00617284	0.12963	0.0493827
4P3K_GLMD	0.0111111	0.0666667	0.0722222	0.0388889	0.0388889	0.0388889	0	0.0222222	0.0888889	0.0888889	0	0.0722222	0.122222	0.0888889	0.0555556	0.0944444	0.0277778	0.00555556	0.0555556	0.0111111
4P3R_GLMD	0.0314465	0.0377358	0.0628931	0.0566038	0.0628931	0.0251572	0.0377358	0.0377358	0.0691824	0.0566038	0.0314465	0.0754717	0.0691824	0.081761	0.081761	0.0754717	0.0251572	0.0125786	0.0377358	0.0314465
4PQQ_GLMD	0.0192308	0.0833333	0.0384615	0.0961538	0.0705128	0.0320513	0.0576923	0.0705128	0.108974	0.025641	0.0320513	0.0705128	0.0448718	0.0448718	0.0128205	0.0641026	0.0448718	0.025641	0.0384615	0.0192308
4Q0K_GLMD	0.00617284	0.0740741	0.0802469	0.0555556	0.037037	0.0493827	0.0493827	0.0555556	0.111111	0.00617284	0.00617284	0.0864198	0.0925926	0.037037	0.037037	0.0740741	0.0432099	0	0.0864198	0.0123457
4Q68_GLMD	0.0291667	0.0875	0.0708333	0.0666667	0.0458333	0.0291667	0.0125	0.05	0.104167	0.0291667	0.0125	0.0458333	0.0708333	0.0833333	0.0708333	0.0625	0.0416667	0.00833333	0.0541667	0.025
4QPT_GLMD	0.0418605	0.0697674	0.0651163	0.0976744	0.055814	0.0372093	0.0651163	0.0744186	0.0697674	0.0325581	0.00465116	0.0604651	0.0697674	0.0465116	0.0604651	0.0186047	0.0418605	0.027907	0.0325581	0.027907
4QPW_GLMD	0.0211268	0.084507	0.0985915	0.0774648	0.0140845	0.028169	0.056338	0.0492958	0.0352113	0.0140845	0.0211268	0.0985915	0.0774648	0.0422535	0.056338	0.0633803	0.0492958	0.00704225	0.0774648	0.028169
4QTQ_GLMD	0.0280374	0.0654206	0.0794393	0.0841121	0.046729	0.0280374	0.0280374	0.0700935	0.0747664	0.0186916	0.0046729	0.0700935	0.0747664	0.0747664	0.0607477	0.0560748	0.0327103	0.0186916	0.0607477	0.0233645
4RAX_GLMD	0.015873	0.0357143	0.0595238	0.0674603	0.0833333	0.0833333	0.0357143	0.031746	0.0873016	0.047619	0.015873	0.0753968	0.0714286	0.047619	0.0674603	0.047619	0.031746	0.00793651	0.0555556	0.031746
4REH_GLMD	0.013245	0.0728477	0.0794702	0.0662252	0.0331126	0.013245	0.0529801	0.0397351	0.0728477	0.013245	0.013245	0.0927152	0.0993377	0.0794702	0.0331126	0.0794702	0.0198675	0.013245	0.0596026	0.0529801
4ROW_GLMD	0.0252525	0.0353535	0.0555556	0.0606061	0.040404	0.0555556	0.0707071	0.0454545	0.0858586	0.0656566	0.030303	0.0606061	0.0353535	0.0606061	0.0555556	0.0353535	0.0252525	0.0505051	0.0505051	0.0555556
4RYO_GLMD	0.0331492	0.0497238	0.0276243	0.0883978	0.0331492	0.0220994	0.104972	0.0441989	0.127072	0.00552486	0.038674	0.0110497	0.0497238	0.0441989	0.0552486	0.0773481	0.0718232	0.00552486	0.0552486	0.0552486
4UYR_GLMD	0.0236967	0.028436	0.0853081	0.0995261	0.0379147	0.07109	0.042654	0.0853081	0.0521327	0.00947867	0.0331754	0.0236967	0.056872	0.0616114	0.028436	0.0473934	0.0521327	0.028436	0.0853081	0.0473934
4WH9_GLMD	0.0218579	0.0710383	0.0491803	0.0765027	0.0655738	0.0218579	0.0655738	0.0273224	0.0874317	0.0710383	0.00546448	0.0765027	0.0437158	0.0710383	0.0437158	0.0546448	0.0601093	0.0218579	0.0327869	0.0327869
4WOH_GLMD	0.0240964	0.0421687	0.0783133	0.0722892	0.0421687	0.0481928	0.0361446	0.0421687	0.0903614	0.060241	0.0120482	0.0722892	0.0662651	0.0421687	0.0843373	0.0481928	0.0301205	0.0240964	0.0361446	0.0481928
4XDQ_GLMD	0.0262172	0.0262172	0.104869	0.0337079	0.101124	0.0187266	0.0486891	0.0449438	0.0486891	0.0486891	0.0524345	0.0524345	0.0636704	0.071161	0.0898876	0.0411985	0.0337079	0.00374532	0.0524345	0.0374532
4XEZ_GLMD	0.02	0.06	0.055	0.065	0.035	0.03	0.055	0.065	0.105	0.05	0.015	0.085	0.045	0.055	0.05	0.04	0.025	0.02	0.07	0.055
4XXT_GLMD	0.0114943	0.0996169	0.0689655	0.0842912	0.045977	0.0536398	0.0421456	0.0804598	0.0651341	0.0191571	0.0114943	0.0114943	0.0613027	0.0689655	0.0613027	0.0574713	0.045977	0.0114943	0.0842912	0.0153257
4YG0_GLMD	0.0121951	0.0182927	0.0609756	0.103659	0.0426829	0.0365854	0.0426829	0.115854	0.0731707	0.0426829	0.0182927	0.0304878	0.0670732	0.054878	0.0304878	0.0609756	0.0853659	0.00609756	0.0914634	0.00609756
4Z3H_GLMD	0.0151515	0.0606061	0.0808081	0.0505051	0.0555556	0.0353535	0.0707071	0.0707071	0.0606061	0.040404	0.0353535	0.0454545	0.0606061	0.0505051	0.0606061	0.0606061	0.0606061	0.010101	0.0656566	0.010101
4ZGF_GLMD	0.0070922	0.0780142	0.0921986	0.035461	0.035461	0.035461	0.0638298	0.0992908	0.035461	0.0212766	0.0212766	0.0567376	0.035461	0.0638298	0.0851064	0.0780142	0.035461	0	0.0921986	0.0283688
5A0N_GLMD	0.0181818	0.0818182	0.0590909	0.0590909	0.0409091	0.0409091	0.0590909	0.0727273	0.0727273	0.0409091	0.0272727	0.05	0.0409091	0.0590909	0.05	0.0545455	0.0772727	0.00454545	0.0772727	0.0136364
5AOZ_GLMD	0.0295858	0.0710059	0.0828402	0.0828402	0.0532544	0.0118343	0.0473373	0.0769231	0.0473373	0.00591716	0	0.0473373	0.112426	0.0769231	0.0828402	0.0295858	0.0236686	0	0.0710059	0.0473373
5B5H_GLMD	0.00896861	0.044843	0.130045	0.0807175	0.044843	0.0358744	0.0313901	0.0224215	0.0852018	0.00896861	0.0134529	0.0134529	0.0762332	0.0179372	0.152466	0.0717489	0.0224215	0	0.139013	0
5B82_GLMD	0.026178	0.0418848	0.0628272	0.0418848	0.0575916	0.0837696	0.0366492	0.0418848	0.0890052	0.0628272	0.0157068	0.0418848	0.0628272	0.0418848	0.13089	0.0471204	0.026178	0.0157068	0.0471204	0.026178
5C10_GLMD	0.0395683	0.0683453	0.0899281	0.0647482	0.0359712	0.0251799	0.028777	0.0251799	0.0755396	0.0467626	0.0215827	0.0683453	0.0539568	0.0755396	0.111511	0.0395683	0.0323741	0.00719424	0.0431655	0.0467626
5C17_GLMD	0.0143541	0.0813397	0.0574163	0.0717703	0.0382775	0.0478469	0.0382775	0.0334928	0.100478	0.0334928	0.0191388	0.0717703	0.0669856	0.0287081	0.0717703	0.0813397	0.0143541	0.0143541	0.0909091	0.0239234
5D18_GLMD	0.0277778	0.0277778	0.0509259	0.0694444	0.0509259	0.0462963	0.037037	0.00462963	0.101852	0.087963	0.00925926	0.0740741	0.0648148	0.0555556	0.12037	0.0416667	0.0231481	0.00462963	0.0509259	0.0509259
5DUS_GLMD	0.0119048	0.077381	0.0833333	0.077381	0.0357143	0.0357143	0.0178571	0.0416667	0.10119	0.0178571	0	0.0357143	0.130952	0.0416667	0.107143	0.0595238	0.0357143	0.0178571	0.0357143	0.0357143
5FQA_GLMD	0.00881057	0.101322	0.0881057	0.0572687	0.0220264	0.0220264	0.0176211	0.0704846	0.110132	0.0220264	0.0176211	0.0704846	0.101322	0.0484581	0.0484581	0.0572687	0.0220264	0.00440529	0.0792952	0.030837
5G3Y_GLMD	0.0132743	0.0840708	0.106195	0.0176991	0.0442478	0.039823	0.0265487	0.0309735	0.106195	0.0486726	0	0.0973451	0.0619469	0.0840708	0.0663717	0.0663717	0.0353982	0.0221239	0.039823	0.00884956
5GM9_GLMD	0.00938967	0.0234742	0.122066	0.117371	0.0657277	0.0704225	0.0657277	0.0469484	0.028169	0.028169	0.028169	0.00938967	0.0516432	0.0610329	0.103286	0.0234742	0.028169	0.0657277	0.0516432	0
5GYJ_GLMD	0.0226244	0.126697	0.0271493	0.0950226	0.00904977	0.0180995	0.0588235	0.113122	0.0678733	0.0135747	0.00452489	0.040724	0.040724	0.0950226	0.0180995	0.0723982	0.0769231	0.00452489	0.0542986	0.040724
5GYQ_GLMD	0.0170455	0.0170455	0.0454545	0.0738636	0.0852273	0.0340909	0.0511364	0.0625	0.0852273	0.0454545	0.00568182	0.00568182	0.0965909	0.0454545	0.0738636	0.0340909	0.0795455	0.0340909	0.0511364	0.0568182
5I8T_GLMD	0.0502793	0.0726257	0.0391061	0.0335196	0.0558659	0.0223464	0.0391061	0.027933	0.0782123	0.0726257	0.027933	0.0949721	0.0446927	0.0893855	0.0502793	0.0614525	0.0614525	0.00558659	0.0446927	0.027933
5IMA_GLMD	0.00625	0.075	0.08125	0.05625	0.04375	0.0375	0.05625	0.01875	0.1125	0.03125	0.0125	0.04375	0.075	0.06875	0.125	0.025	0.01875	0.01875	0.05625	0.03125
5J6Y_GLMD	0.00531915	0.0159574	0.106383	0.106383	0.0265957	0.0425532	0.0425532	0.0531915	0.0638298	0.0106383	0.0106383	0.0425532	0.0585106	0.101064	0.0851064	0.0478723	0.0691489	0	0.101064	0.0106383
5JNV_GLMD	0.00628931	0.0566038	0.0440252	0.0691824	0.0314465	0.0503145	0.0377358	0.0628931	0.0691824	0.0754717	0.00628931	0.0566038	0.0943396	0.081761	0.0628931	0.0566038	0.0377358	0.0503145	0.0377358	0.0125786
5JUG_GLMD	0.0178571	0.0297619	0.125	0.10119	0.0238095	0.0714286	0.0297619	0.0595238	0.077381	0.0357143	0.0238095	0.00595238	0.0416667	0.0654762	0.14881	0.0238095	0.0416667	0.0238095	0.0357143	0.0178571
5K9B_GLMD	0.0111111	0.0666667	0.111111	0.0833333	0.0277778	0.0277778	0.0722222	0.0333333	0.111111	0.0277778	0.0166667	0.0888889	0.0555556	0.0777778	0.0777778	0.0333333	0.0277778	0.00555556	0.0444444	0
5L71_GLMD	0.0409357	0.0818713	0.0818713	0.0350877	0.0409357	0.0409357	0.0467836	0.0526316	0.0584795	0.0526316	0.0233918	0.0467836	0.0701754	0.0701754	0.0643275	0.0467836	0.0409357	0.0584795	0.0233918	0.0233918
5LJM_GLMD	0.0232558	0.0697674	0.0465116	0.106977	0.027907	0.027907	0.055814	0.00465116	0.116279	0.0790698	0.00465116	0.0930233	0.0744186	0.0511628	0.0465116	0.0325581	0.0465116	0.0186047	0.055814	0.0186047
5LY8_GLMD	0.0121457	0.0242915	0.101215	0.0809717	0.0445344	0.0445344	0.0728745	0.0931174	0.0445344	0.0445344	0.0323887	0.0323887	0.0647773	0.0809717	0.0566802	0.0404858	0.0526316	0	0.0688259	0.00809717
5MJR_GLMD	0.0209205	0.0334728	0.0460251	0.0669456	0.0627615	0.0669456	0.0334728	0.0376569	0.112971	0.0794979	0.0041841	0.0711297	0.0585774	0.0502092	0.0878661	0.041841	0.0334728	0.0041841	0.0334728	0.0543933
5ML3_GLMD	0.0268456	0.0738255	0.0469799	0.0738255	0.033557	0.0402685	0.0738255	0.0402685	0.0939597	0.0604027	0.0268456	0.107383	0.0738255	0.0402685	0.0536913	0.0469799	0.0134228	0.0134228	0.0536913	0.00671141
5O1X_GLMD	0.0111111	0.05	0.0888889	0.0666667	0.0777778	0.0277778	0.0388889	0.0722222	0.0722222	0.0444444	0.0222222	0.0444444	0.0888889	0.0555556	0.0444444	0.05	0.0388889	0.0111111	0.05	0.0444444
5TIF_GLMD	0.027027	0.0540541	0.0702703	0.0594595	0.0702703	0.0918919	0.0324324	0.0432432	0.12973	0.0486486	0.027027	0.0378378	0.0432432	0.0648649	0.0972973	0.0378378	0.0216216	0	0.027027	0.0162162
5TPK_GLMD	0.00917431	0.0229358	0.0504587	0.059633	0.0550459	0.0183486	0.0504587	0.0642202	0.0917431	0.0412844	0	0.0642202	0.105505	0.0688073	0.0825688	0.0504587	0.0412844	0	0.0688073	0.0550459
5UFY_GLMD	0.0357143	0.0714286	0.0758929	0.0535714	0.0357143	0.0446429	0.00892857	0.0535714	0.0625	0.0178571	0.0178571	0.0580357	0.0535714	0.0758929	0.116071	0.0580357	0.03125	0	0.0848214	0.0446429
5VHG_GLMD	0.0133333	0.0933333	0.08	0.0933333	0.0466667	0.0533333	0.0533333	0.06	0.0533333	0.04	0.02	0.0666667	0.0666667	0.0266667	0.106667	0.0133333	0.04	0.0133333	0.04	0.02
5XG5_GLMD	0.0275862	0.124138	0.0965517	0.0827586	0.062069	0.0206897	0.062069	0.062069	0.0827586	0.0206897	0	0.0206897	0.062069	0.0827586	0.0206897	0.0206897	0.0413793	0	0.0206897	0.0896552
1BTE_GLHD	0.0172414	0.0603448	0.0517241	0.0948276	0.0862069	0.0517241	0.0258621	0.0344828	0.0689655	0.0172414	0.0172414	0.0862069	0.0603448	0.0258621	0.0775862	0.0517241	0.00862069	0.0862069	0.0344828	0.0431034
1G8E_GLHD	0	0.103448	0.0172414	0.0517241	0.0517241	0.103448	0.0344828	0.137931	0.12069	0.0172414	0.0172414	0.0862069	0	0.0689655	0.12069	0.0344828	0.0172414	0	0	0.0172414
1GOU_GLHD	0.0166667	0.0583333	0.0583333	0.05	0.05	0.0666667	0.025	0.0333333	0.075	0.05	0.00833333	0.05	0.0833333	0.0916667	0.0916667	0.0333333	0.0166667	0.0166667	0.0583333	0.0666667
1GYX_GLHD	0.0657895	0.0526316	0.0789474	0.0263158	0.0263158	0.0526316	0.0657895	0.0394737	0.0789474	0.0263158	0	0.118421	0.0263158	0.105263	0.0789474	0.0526316	0	0	0.105263	0
1H4X_GLHD	0.0545455	0.0636364	0.1	0.0363636	0.1	0.0636364	0.0545455	0.00909091	0.0272727	0.0363636	0.00909091	0.0727273	0.136364	0.0454545	0.0363636	0.0363636	0.0181818	0.0272727	0.0454545	0.0272727
1JO0_GLHD	0.012987	0.038961	0.0519481	0.0779221	0.103896	0.0779221	0.038961	0.012987	0.0649351	0.0649351	0.012987	0.038961	0.0519481	0.0779221	0.0909091	0.103896	0.012987	0.012987	0.0519481	0
1LN0_GLHD	0.0291262	0.0873786	0.0970874	0.0485437	0.0291262	0	0.038835	0.0485437	0.106796	0.038835	0	0.116505	0.0485437	0.0485437	0.0485437	0.116505	0.00970874	0	0.0194175	0.0679612
1M2D_GLHD	0.0291262	0.0873786	0.0970874	0.0485437	0.0291262	0	0.038835	0.0485437	0.106796	0.038835	0	0.116505	0.0485437	0.0485437	0.0485437	0.116505	0.00970874	0	0.0194175	0.0679612
1NT3_GLHD	0.0416667	0.0333333	0.025	0.05	0.025	0.05	0.0416667	0.0666667	0.0666667	0.0916667	0.025	0.0833333	0.0166667	0.0583333	0.0916667	0.125	0.0333333	0.0166667	0.05	0.00833333
1NYC_GLHD	0.0336134	0.0420168	0.0420168	0.0588235	0.0588235	0.0504202	0.0252101	0.0504202	0.092437	0.0168067	0.0168067	0.0756303	0.092437	0.109244	0.0756303	0.0420168	0.0252101	0.0504202	0.0336134	0.00840336
1O7I_GLHD	0.0314961	0.0629921	0.023622	0.0866142	0.0708661	0.0629921	0.0472441	0.015748	0.0944882	0.0314961	0.015748	0.0787402	0.0551181	0.0551181	0.0472441	0.0393701	0.015748	0.0314961	0.110236	0.023622
1OB8_GLHD	0.01	0.04	0.07	0.08	0.06	0.03	0.04	0.02	0.05	0.12	0.01	0.09	0.06	0.07	0.09	0.09	0.02	0	0.03	0.02
1OQJ_GLHD	0.0267857	0.0357143	0.0535714	0.0535714	0.0803571	0.0446429	0.00892857	0.0267857	0.0982143	0.0625	0.0178571	0.0178571	0.0714286	0.0714286	0.0892857	0.0357143	0.0178571	0.0803571	0.0625	0.0446429
1P28_GLHD	0.0222222	0.0666667	0.0777778	0.0444444	0.0777778	0.0666667	0.0333333	0.0666667	0.0444444	0.1	0.0111111	0.0555556	0.0888889	0.0333333	0.0888889	0.0666667	0.0222222	0	0.0333333	0
1PFS_GLHD	0	0.0408163	0.0612245	0.0714286	0.0306122	0.0510204	0.0306122	0.0102041	0.0714286	0.0102041	0	0.102041	0.0816327	0.112245	0.0918367	0.0510204	0.0510204	0.0306122	0.0816327	0.0204082
1POS_GLHD	0	0.0431034	0.0517241	0.0948276	0.0689655	0.0431034	0.0775862	0.00862069	0.0603448	0.0517241	0.00862069	0.0344828	0.0948276	0.0862069	0.0431034	0.0344828	0.0603448	0.0172414	0.103448	0.0172414
1PSR_GLHD	0	0.0697674	0.0465116	0.0697674	0.0813953	0.0116279	0	0.0348837	0.0581395	0.0813953	0	0.0465116	0.0465116	0.0232558	0.104651	0.0348837	0.0348837	0.139535	0.0930233	0.0232558
1Q0A_GLHD	0.0309278	0.0824742	0.0515464	0.0515464	0.0618557	0.0206186	0.0103093	0.0309278	0.0824742	0.0309278	0.0103093	0.0824742	0.0721649	0.0309278	0.123711	0.113402	0.0515464	0	0.0412371	0.0206186
1Q8B_GLHD	0.0194175	0.106796	0.0970874	0.0679612	0.038835	0.0194175	0.0194175	0.0485437	0.0776699	0.0485437	0.0291262	0.038835	0.0679612	0.0776699	0.0194175	0.038835	0.0679612	0	0.106796	0.00970874
1QOA_GLHD	0	0.0549451	0.043956	0.142857	0.032967	0.010989	0.032967	0.032967	0.0659341	0.010989	0	0.032967	0.0879121	0.032967	0.120879	0.021978	0.010989	0.0659341	0.153846	0.043956
1R77_GLHD	0.015748	0.0551181	0.0787402	0.0944882	0.0551181	0.023622	0.0393701	0.0314961	0.0551181	0.0629921	0.00787402	0.0708661	0.0708661	0.0393701	0.0787402	0.0551181	0.023622	0.015748	0.0708661	0.0551181
1RLK_GLHD	0.0379747	0.0632911	0	0.0506329	0.0506329	0.0379747	0.0379747	0.0506329	0.177215	0.113924	0.0126582	0.0886076	0.0379747	0.0632911	0.0886076	0.0379747	0	0	0.0506329	0
1RMD_GLHD	0.0188679	0.0377358	0.0566038	0.0849057	0.113208	0.0471698	0.0660377	0.0377358	0.00943396	0.0471698	0.0188679	0.0660377	0.0660377	0.0566038	0.0566038	0.0283019	0.0188679	0.132075	0.0283019	0.00943396
1S4K_GLHD	0.0373832	0.121495	0.0654206	0.0373832	0.046729	0.00934579	0.0280374	0.0280374	0.0747664	0.046729	0	0.130841	0.0373832	0.046729	0.0186916	0.11215	0.11215	0	0.0373832	0.00934579
1TVD_GLHD	0.00917431	0.0642202	0.0366972	0.0642202	0.00917431	0.00917431	0.0366972	0.0458716	0.110092	0.0550459	0.0275229	0.137615	0.0825688	0.0275229	0.0183486	0.0550459	0.0550459	0	0.0733945	0.0825688
1U07_GLHD	0.0306122	0.0918367	0.0816327	0.122449	0.0102041	0.0102041	0.0612245	0.0714286	0.0306122	0.0714286	0	0.142857	0.0714286	0.0204082	0.0306122	0.0408163	0.0612245	0	0.0306122	0.0204082
1U2H_GLHD	0.011236	0.0337079	0.0898876	0.0674157	0.0224719	0.0898876	0.0224719	0.0337079	0.134831	0.0337079	0	0.0786517	0.0898876	0.0224719	0.0898876	0.0674157	0.0224719	0	0.0561798	0.0337079
1U36_GLHD	0.0138889	0.0138889	0.0694444	0.0972222	0.0277778	0.0416667	0.0138889	0.0972222	0.0694444	0.111111	0.0138889	0.0555556	0.0138889	0.0416667	0.0277778	0.0138889	0.0277778	0.111111	0.0138889	0.125
1UV7_GLHD	0	0.025974	0.155844	0.012987	0.116883	0.025974	0.0519481	0	0.025974	0.025974	0	0.0649351	0.0779221	0.0909091	0.038961	0.038961	0.038961	0.155844	0.0519481	0
1VJQ_GLHD	0.00970874	0.0970874	0.0776699	0.00970874	0.038835	0.038835	0.0485437	0.0194175	0.0485437	0.0291262	0.0485437	0.0970874	0.116505	0.0776699	0.0485437	0.0776699	0.0485437	0	0.0485437	0.0194175
1VR9_GLHD	0	0.0517241	0.0775862	0.0862069	0.0344828	0.00862069	0.0431034	0.0431034	0.0603448	0.0862069	0.0258621	0.0258621	0.0689655	0.0775862	0.103448	0.0603448	0.0603448	0	0.0775862	0.00862069
1WV9_GLHD	0.0361446	0.0843373	0.0843373	0.0481928	0.0240964	0.0361446	0.0361446	0.0240964	0.0843373	0.13253	0	0.0722892	0.0361446	0.0361446	0.0843373	0.0240964	0.0240964	0.0722892	0.0361446	0.0240964
1X6I_GLHD	0.036036	0.036036	0.0720721	0.126126	0.00900901	0.027027	0.036036	0.027027	0.126126	0.0630631	0	0.0540541	0.0630631	0.045045	0.0990991	0.0540541	0.045045	0.00900901	0.045045	0.027027
1XD7_GLHD	0.0515464	0.123711	0.0721649	0.0618557	0.0309278	0.0309278	0.0412371	0.0309278	0.0721649	0.0412371	0.0206186	0.0309278	0.0515464	0.0618557	0.0515464	0.0824742	0.0206186	0.0515464	0.0412371	0.0309278
2B1Y_GLHD	0.0119048	0.0595238	0.0238095	0.047619	0.047619	0.0714286	0.047619	0.0119048	0.0952381	0.0833333	0	0.0595238	0.047619	0.0714286	0.0357143	0.0595238	0.0952381	0.0714286	0.0357143	0.0238095
2B8M_GLHD	0.0119048	0.0595238	0.0238095	0.047619	0.047619	0.0714286	0.047619	0.0119048	0.0952381	0.0833333	0	0.0595238	0.047619	0.0714286	0.0357143	0.0595238	0.0952381	0.0714286	0.0357143	0.0238095
2B9Z_GLHD	0.03	0.07	0.06	0.03	0.05	0.07	0.02	0.06	0.08	0.12	0	0.08	0.07	0.03	0.06	0.08	0.01	0	0.07	0.01
2C3V_GLHD	0.0366972	0.0733945	0.0917431	0.0825688	0.0550459	0.0550459	0.0366972	0.0458716	0.0733945	0.0642202	0.0275229	0.0550459	0.0183486	0.0550459	0.0550459	0.0458716	0.0550459	0.00917431	0.0366972	0.0275229
2CVI_GLHD	0.0540541	0.0675676	0.0540541	0.0540541	0.0540541	0.0405405	0	0.0540541	0.135135	0.0540541	0	0.0540541	0.0810811	0.0540541	0.121622	0.027027	0.027027	0.0135135	0.0405405	0.0135135
2DSM_GLHD	0.029703	0.0594059	0.0594059	0.0891089	0.029703	0.019802	0.019802	0.0792079	0.0693069	0.019802	0	0.049505	0.049505	0.049505	0.049505	0.128713	0.039604	0.029703	0.0891089	0.039604
2EBB_GLHD	0.0152672	0.0381679	0.0687023	0.0458015	0.0381679	0.0152672	0.0152672	0.0839695	0.0610687	0.0458015	0.0152672	0.0839695	0.129771	0.0229008	0.129771	0.0534351	0.00763359	0.00763359	0.0839695	0.0381679
2EUC_GLHD	0.0406504	0.0569106	0.0731707	0.105691	0.0162602	0.0406504	0.0243902	0.0325203	0.0650407	0.0325203	0	0.0731707	0.097561	0.097561	0.0894309	0.0569106	0.0406504	0.00813008	0.0325203	0.0162602
2F5Y_GLHD	0.0252101	0.151261	0.0252101	0.092437	0.0168067	0	0.0588235	0.0672269	0.0588235	0.0336134	0	0.0252101	0.0504202	0.0588235	0	0.10084	0.092437	0	0.0756303	0.0672269
2FFG_GLHD	0.0252101	0.151261	0.0252101	0.092437	0.0168067	0	0.0588235	0.0672269	0.0588235	0.0336134	0	0.0252101	0.0504202	0.0588235	0	0.10084	0.092437	0	0.0756303	0.0672269
2GE7_GLHD	0.0111111	0.0777778	0.0777778	0.0888889	0.0555556	0.0777778	0.0222222	0.0222222	0.0888889	0.0444444	0	0.0777778	0.1	0.0444444	0.0555556	0.0555556	0.0222222	0	0.0444444	0.0333333
2GZV_GLHD	0.00934579	0.0934579	0.0560748	0.0934579	0.046729	0.0373832	0.0186916	0.0373832	0.0747664	0.046729	0.00934579	0.102804	0.0747664	0.0373832	0.0560748	0.0280374	0.046729	0.0280374	0.0373832	0.0654206
2I68_GLHD	0.0227273	0.0568182	0.0454545	0.0795455	0.0454545	0.0340909	0.0113636	0.0227273	0.136364	0.0227273	0.0227273	0.0909091	0.0681818	0.0795455	0.0795455	0.0568182	0.0454545	0	0.0681818	0.0113636
2IC2_GLHD	0.0518519	0.0296296	0.103704	0.0444444	0.0592593	0.037037	0.0222222	0.037037	0.118519	0.111111	0.0148148	0.0888889	0.037037	0.0518519	0.0888889	0.037037	0.0148148	0.00740741	0.0222222	0.0222222
2IJL_GLHD	0.0212766	0.0957447	0.0212766	0.0106383	0.0638298	0.0425532	0.0425532	0.0425532	0.148936	0.0638298	0.0212766	0.12766	0.0531915	0.0212766	0.0106383	0.0638298	0.0425532	0.0212766	0.0638298	0.0212766
2IQJ_GLHD	0.0714286	0.1	0.0428571	0.0714286	0.0714286	0.0285714	0.0285714	0.0285714	0.114286	0.0285714	0	0.0857143	0.0428571	0.0571429	0.0285714	0.0571429	0.0142857	0.0285714	0.0857143	0.0142857
2IYJ_GLHD	0.0119048	0.0595238	0.0833333	0.0714286	0.0357143	0.0238095	0.0952381	0.0595238	0.0714286	0.0119048	0.0357143	0.0714286	0.0714286	0.154762	0.0119048	0.0357143	0.047619	0.0119048	0.0238095	0.0119048
2J73_GLHD	0.0106383	0.0212766	0.0744681	0.0106383	0.0744681	0.0319149	0.0425532	0.0106383	0.117021	0.138298	0	0.148936	0.0638298	0.0425532	0.0851064	0.0319149	0	0.0106383	0.0425532	0.0425532
2J97_GLHD	0.0480769	0.0673077	0.0384615	0.0192308	0.0192308	0.0673077	0.0384615	0.0192308	0.0865385	0.0576923	0.0192308	0.0961538	0.0288462	0.0769231	0.173077	0.0288462	0.0384615	0.0192308	0.0288462	0.0288462
2JJU_GLHD	0.0471698	0.00943396	0.0754717	0.132075	0.0471698	0.0377358	0	0.0188679	0.122642	0.0566038	0	0.0660377	0.0754717	0.0566038	0.0943396	0.0377358	0.0471698	0	0.0377358	0.0377358
2JWK_GLHD	0.0357143	0.0625	0.0625	0.0178571	0.0267857	0.0803571	0.00892857	0.0535714	0.107143	0.0535714	0.0267857	0.0535714	0.0982143	0.0982143	0.0357143	0.0535714	0.0625	0.00892857	0.0357143	0.0178571
2LJY_GLHD	0.0361446	0.060241	0.060241	0	0.0120482	0.0481928	0.0481928	0.0361446	0.0722892	0.060241	0	0.144578	0.060241	0.060241	0.0361446	0.0963855	0.060241	0.0120482	0.060241	0.0361446
2MH3_GLHD	0.034188	0.111111	0.034188	0.025641	0.0683761	0.034188	0.034188	0.0769231	0.0683761	0.017094	0	0.102564	0.102564	0.034188	0.025641	0.0940171	0.042735	0.00854701	0.034188	0.0512821
2MHE_GLHD	0.0375	0.04375	0.1	0.04375	0.0625	0.05	0.03125	0.01875	0.075	0.0375	0.00625	0.06875	0.0625	0.04375	0.13125	0.05	0.03125	0.025	0.04375	0.0375
2NLV_GLHD	0.0408163	0.0408163	0.0918367	0.0612245	0.0408163	0.0306122	0.0102041	0.0204082	0.0510204	0.0612245	0.0102041	0.0816327	0.102041	0.0612245	0.102041	0.0510204	0.0204082	0	0.0816327	0.0408163
2NML_GLHD	0.0192308	0.105769	0.0576923	0.0288462	0.0384615	0.0288462	0.0673077	0.0288462	0.0480769	0.0192308	0.0192308	0.0961538	0.105769	0.0576923	0.0384615	0.0865385	0.0576923	0	0.0673077	0.0288462
2OAI_GLHD	0.0173913	0.0608696	0.0782609	0.104348	0.0695652	0.0347826	0.026087	0.0608696	0.121739	0.026087	0	0.0608696	0.0521739	0.0434783	0.0521739	0.0608696	0.026087	0.0173913	0.0521739	0.0347826
2OFY_GLHD	0.0173913	0.0608696	0.0782609	0.104348	0.0695652	0.0347826	0.026087	0.0608696	0.121739	0.026087	0	0.0608696	0.0521739	0.0434783	0.0521739	0.0608696	0.026087	0.0173913	0.0521739	0.0347826
2P04_GLHD	0	0.0555556	0.0888889	0.1	0.0777778	0.0444444	0.0555556	0.0666667	0.0666667	0.0222222	0.0333333	0.0555556	0.0888889	0.0444444	0.0222222	0.0777778	0.0111111	0	0.0444444	0.0444444
2P13_GLHD	0.0425532	0.0638298	0.0425532	0.0957447	0.0319149	0.0319149	0.0638298	0.0744681	0.0851064	0.0319149	0	0.0531915	0.0425532	0.0319149	0.0957447	0.0106383	0.0744681	0.0212766	0.0957447	0.0106383
2PK8_GLHD	0.0212766	0.0425532	0.0425532	0.0744681	0.0531915	0.0531915	0.0425532	0.0319149	0.0957447	0.0638298	0	0.0744681	0.0638298	0.0212766	0.0319149	0.0957447	0.0425532	0	0.0744681	0.0744681
2PQ3_GLHD	0.0176991	0.0707965	0.079646	0.0265487	0.0265487	0.0442478	0.0530973	0.0442478	0.0884956	0.079646	0.00884956	0.0619469	0.141593	0.0442478	0.0442478	0.0442478	0.00884956	0.0176991	0.0442478	0.0530973
2PRX_GLHD	0	0.0824742	0.0824742	0.0618557	0.0309278	0.0824742	0.0515464	0.0206186	0.0927835	0.0309278	0.0103093	0.103093	0.0721649	0.0515464	0.0824742	0.0412371	0.0412371	0	0.0618557	0
2QJZ_GLHD	0.0117647	0.176471	0.0588235	0.0705882	0.0352941	0.0352941	0.0588235	0.0235294	0.0352941	0.0117647	0.0117647	0.0705882	0.0823529	0.0588235	0.0588235	0.0352941	0.0235294	0.0705882	0.0470588	0.0235294
2R2C_GLHD	0.0325203	0.113821	0.0650407	0.0406504	0.0243902	0.0813008	0.0894309	0.0487805	0.0894309	0.0243902	0.0162602	0.0406504	0.0487805	0.0813008	0.0731707	0.0569106	0.0325203	0.0162602	0.00813008	0.0162602
2RK5_GLHD	0.0291262	0.0582524	0.0582524	0.126214	0.0291262	0.0485437	0	0.0291262	0.0582524	0.0582524	0.0291262	0.0873786	0.145631	0.0291262	0.0485437	0.038835	0.0194175	0.0194175	0.0873786	0
2UTG_GLHD	0.0181818	0.0454545	0.0818182	0.1	0.0363636	0	0.0727273	0.0363636	0.0727273	0.0454545	0.0181818	0.0454545	0.0727273	0.0545455	0.1	0.0363636	0.0454545	0.00909091	0.0909091	0.0181818
2V2K_GLHD	0.00943396	0.0471698	0.0754717	0.132075	0.0471698	0.0283019	0.0566038	0.0188679	0.0566038	0.0849057	0	0.0660377	0.0849057	0.0943396	0.0377358	0.0566038	0.0188679	0.00943396	0.0188679	0.0566038
2V33_GLHD	0.00980392	0.0392157	0.127451	0.0882353	0.0392157	0.0392157	0.0196078	0.0490196	0.0588235	0.0294118	0.0294118	0.0490196	0.0392157	0.0588235	0.0686275	0.0490196	0.0588235	0	0.0980392	0.0490196
2V94_GLHD	0.0659341	0.032967	0.043956	0.043956	0.043956	0.010989	0.043956	0.0549451	0.0879121	0.10989	0.021978	0.0879121	0.021978	0.0989011	0.0549451	0.0879121	0.010989	0.021978	0.010989	0.043956
2W1R_GLHD	0.0277778	0.0277778	0.0648148	0.0648148	0.037037	0.0462963	0.0185185	0.0277778	0.037037	0.0740741	0.00925926	0.101852	0.12037	0.0555556	0.111111	0.0833333	0.00925926	0.0185185	0.0277778	0.037037
2W7A_GLHD	0.0315789	0.0736842	0.0631579	0.0736842	0.0315789	0.0947368	0.0947368	0.0421053	0.0631579	0.0315789	0.0210526	0.0631579	0.0842105	0.0736842	0.0315789	0.0526316	0.0105263	0	0.0421053	0.0210526
2W8X_GLHD	0.0183486	0.0366972	0.0550459	0.12844	0.0550459	0.0550459	0.0183486	0.0275229	0.0917431	0.0733945	0	0.0642202	0.0642202	0.0642202	0.100917	0.0550459	0.0366972	0	0.0183486	0.0366972
2X3G_GLHD	0.0172414	0.0862069	0.0344828	0.0517241	0.0517241	0.137931	0.0172414	0.0258621	0.0948276	0.0344828	0.00862069	0.0431034	0.0689655	0.0689655	0.0862069	0.0689655	0.0344828	0	0.0431034	0.0258621
2Z0W_GLHD	0.0357143	0.0803571	0.0535714	0.0714286	0.0267857	0.0625	0.0267857	0.0357143	0.0803571	0.0625	0.0446429	0.0267857	0.0267857	0.116071	0.0267857	0.0625	0.0178571	0.0535714	0.0714286	0.0178571
2Z14_GLHD	0.0357143	0.0803571	0.0535714	0.0714286	0.0267857	0.0625	0.0267857	0.0357143	0.0803571	0.0625	0.0446429	0.0267857	0.0267857	0.116071	0.0267857	0.0625	0.0178571	0.0535714	0.0714286	0.0178571
3AJ4_GLHD	0.0225564	0.0526316	0.075188	0.105263	0.0601504	0.0300752	0.0225564	0.0676692	0.0676692	0.0451128	0.0150376	0.0451128	0.075188	0.037594	0.112782	0.0526316	0.0150376	0	0.0902256	0.0075188
3BF4_GLHD	0.0434783	0.130435	0.00869565	0.0434783	0.00869565	0.0173913	0.0434783	0.0434783	0.0956522	0.0695652	0.026087	0.0956522	0.0695652	0.104348	0.0956522	0.0347826	0.00869565	0	0.0173913	0.0434783
3BT4_GLHD	0.0298507	0.0746269	0.0671642	0.0522388	0.0298507	0.0597015	0.0298507	0.0597015	0.0671642	0.0746269	0.0223881	0.0597015	0.0597015	0.0671642	0.0671642	0.0671642	0.0373134	0.0373134	0.0223881	0.0149254
3BYP_GLHD	0.018018	0.036036	0.045045	0.0810811	0.00900901	0.0900901	0.045045	0.0630631	0.0900901	0.036036	0.00900901	0.036036	0.027027	0.0720721	0.00900901	0.126126	0.0540541	0.00900901	0.0810811	0.0630631
3C0F_GLHD	0	0.0208333	0.177083	0.135417	0.0625	0.03125	0.0520833	0.0208333	0.0729167	0.0729167	0.0104167	0.0625	0.0729167	0.03125	0.0208333	0.0416667	0.0416667	0.0104167	0.0520833	0.0104167
3CZ1_GLHD	0.026087	0.0782609	0.0521739	0.0782609	0.0869565	0.0347826	0.0347826	0.0869565	0.0695652	0.0608696	0.026087	0.026087	0.0695652	0.0521739	0.0434783	0.0347826	0.0521739	0	0.0782609	0.00869565
3EIP_GLHD	0.0135135	0.0675676	0.121622	0.0405405	0.027027	0.0405405	0.027027	0.0405405	0.121622	0.027027	0	0.121622	0.0945946	0.027027	0.0675676	0.0810811	0.027027	0	0.0405405	0.0135135
3EO6_GLHD	0.0322581	0.0430108	0.0752688	0.0752688	0.0215054	0.0430108	0.0752688	0.0537634	0.0860215	0.0860215	0	0.0645161	0.0752688	0.0860215	0.0215054	0.0322581	0.0752688	0.0322581	0	0.0215054
3EVI_GLHD	0.0263158	0.0438596	0.0614035	0.0438596	0.0614035	0.0526316	0.0350877	0.0614035	0.0614035	0.0263158	0.0175439	0.0526316	0.0877193	0.0438596	0.105263	0.0614035	0.0350877	0.0263158	0.0614035	0.0350877
3F5R_GLHD	0.046729	0.0280374	0.0186916	0.0841121	0.046729	0.0186916	0.046729	0.0280374	0.102804	0.0934579	0.0186916	0.0560748	0.046729	0.0934579	0.046729	0.0747664	0.0654206	0.0186916	0.046729	0.0186916
3FGX_GLHD	0.029703	0.168317	0.039604	0.019802	0.00990099	0.0594059	0.00990099	0.0594059	0.00990099	0.019802	0	0.0990099	0.0693069	0.118812	0.039604	0.108911	0.0891089	0	0.029703	0.019802
3FMB_GLHD	0.00757576	0.0757576	0.0606061	0.113636	0.0681818	0.0606061	0.0378788	0.0530303	0.0909091	0.0227273	0.0151515	0.0681818	0.0606061	0.0454545	0.030303	0.00757576	0.0454545	0.0151515	0.0530303	0.0681818
3FX7_GLHD	0.00847458	0.0677966	0.059322	0.0423729	0.0254237	0.0423729	0.0423729	0.0677966	0.101695	0.0254237	0.0169492	0.101695	0.0762712	0.0254237	0.0508475	0.110169	0.0338983	0.0338983	0.0338983	0.0338983
3FYB_GLHD	0.0253165	0.0632911	0.0506329	0.0253165	0.0886076	0.0632911	0.0759494	0.0506329	0.0759494	0	0.0253165	0.126582	0.101266	0.0379747	0.0506329	0.0632911	0.0253165	0	0.0506329	0
3G1J_GLHD	0	0.0847458	0.059322	0.0932203	0.0254237	0.0508475	0.0338983	0.0508475	0.0338983	0.00847458	0.0169492	0.0508475	0.0847458	0.161017	0.0847458	0.0677966	0.0338983	0.0169492	0.0423729	0
3G21_GLHD	0.042735	0.0598291	0.042735	0.0769231	0.0598291	0.025641	0.0512821	0.042735	0.102564	0.0769231	0	0.0854701	0.042735	0.0683761	0.025641	0.042735	0.017094	0.0512821	0.042735	0.042735
3G27_GLHD	0.0188679	0.0471698	0.0660377	0.113208	0.0283019	0.00943396	0.0566038	0.0754717	0.0660377	0.0849057	0.00943396	0.0471698	0.0849057	0.0943396	0.0377358	0.0471698	0.0660377	0.00943396	0.0283019	0.00943396
3G80_GLHD	0.0208333	0.0520833	0.09375	0.0208333	0.0416667	0.0208333	0.0104167	0.0208333	0.0729167	0.0833333	0.0104167	0.0625	0.0625	0.0520833	0.125	0.0729167	0.0104167	0.0625	0.0729167	0.03125
3GHJ_GLHD	0.0598291	0.017094	0.0854701	0.0512821	0.025641	0.034188	0.0598291	0.025641	0.0854701	0.0854701	0.017094	0.0854701	0.0940171	0.034188	0.0769231	0.0769231	0	0	0.0683761	0.017094
3GLA_GLHD	0.0288462	0.0480769	0.0480769	0.0384615	0.0769231	0.0384615	0.0480769	0.0192308	0.0673077	0.0673077	0.0192308	0.0480769	0.0480769	0.0865385	0.0576923	0.0865385	0.0480769	0.00961538	0.0480769	0.0673077
3H36_GLHD	0.0259067	0.0466321	0.103627	0.0777202	0.015544	0.0777202	0.0259067	0.0829016	0.0725389	0.0621762	0.015544	0.0673575	0.0518135	0.0569948	0.0621762	0.0466321	0.0259067	0	0.0414508	0.0414508
3HZ4_GLHD	0.0176991	0.0707965	0.0442478	0.0619469	0.0265487	0.00884956	0.0884956	0.0884956	0.079646	0	0	0.079646	0.0265487	0.0619469	0.0176991	0.141593	0.0619469	0.00884956	0.0530973	0.0619469
3IC7_GLHD	0.0396825	0.047619	0.0952381	0.103175	0.047619	0.031746	0.0396825	0.0238095	0.0238095	0.047619	0.00793651	0.031746	0.0793651	0.0714286	0.0873016	0.047619	0.015873	0.015873	0.0793651	0.0634921
3IDU_GLHD	0.0208333	0.09375	0.0729167	0.104167	0.0520833	0.0416667	0.03125	0.03125	0.0729167	0.03125	0.0416667	0.0520833	0.03125	0.03125	0.0729167	0.0208333	0.0625	0.0104167	0.0520833	0.0729167
3IUW_GLHD	0.0434783	0.0543478	0.0543478	0.130435	0.0108696	0.0108696	0.0434783	0.0326087	0.0543478	0.0217391	0	0.108696	0.0652174	0.0869565	0.108696	0.076087	0.0108696	0.0108696	0	0.076087
3IWF_GLHD	0.0142857	0.142857	0.114286	0.0571429	0.0142857	0	0.0142857	0.0142857	0.0714286	0.0285714	0.0285714	0.0571429	0.114286	0	0.171429	0.0857143	0.0142857	0	0.0571429	0
3L1E_GLHD	0.0330579	0.0578512	0.0495868	0.0495868	0.0909091	0.0578512	0.0826446	0.0247934	0.132231	0.0413223	0.00826446	0.0826446	0.0330579	0.0247934	0.0578512	0.0909091	0.00826446	0	0.0413223	0.0330579
3L46_GLHD	0.0207254	0.0725389	0.0414508	0.0518135	0.0621762	0.0518135	0.0362694	0.0569948	0.0880829	0.0259067	0.0207254	0.0984456	0.0466321	0.0362694	0.0518135	0.0362694	0.0207254	0.0673575	0.0569948	0.0569948
3LAG_GLHD	0.0465116	0.0542636	0.0620155	0.0697674	0.0465116	0.0232558	0.0310078	0.0852713	0.0775194	0.0465116	0	0.0310078	0.0697674	0.100775	0.0775194	0.0387597	0.0387597	0.0465116	0.0542636	0
3LE1_GLHD	0.0194175	0.0776699	0.0194175	0.106796	0	0.0291262	0.0679612	0.0873786	0.0582524	0.0776699	0	0.0776699	0.0776699	0.0679612	0.0194175	0.0776699	0.0485437	0.0194175	0.0194175	0.0485437
3M8J_GLHD	0.0396825	0.0634921	0.047619	0.031746	0.031746	0.047619	0.031746	0.0555556	0.0793651	0.0714286	0.0238095	0.0714286	0.0555556	0.0714286	0.047619	0.0634921	0.0634921	0	0.0714286	0.031746
3M92_GLHD	0.0252101	0.0840336	0.0840336	0.0672269	0.0420168	0.0672269	0.0168067	0.0588235	0.0420168	0.0420168	0.0168067	0.109244	0.092437	0.0168067	0.0840336	0.0588235	0	0	0.0840336	0.00840336
3M9Q_GLHD	0.021978	0.0879121	0.0659341	0.0549451	0.021978	0.032967	0.032967	0.0549451	0.0549451	0.043956	0.010989	0.131868	0.0769231	0.032967	0.0769231	0.0659341	0.0769231	0.032967	0.010989	0.010989
3MAB_GLHD	0.0515464	0.0412371	0.0309278	0.0309278	0.0309278	0.0721649	0.0309278	0.0515464	0.113402	0.0515464	0	0.0721649	0.0309278	0.0206186	0.123711	0.0412371	0.0309278	0.0206186	0.0618557	0.0927835
3MN2_GLHD	0.0551181	0.0314961	0.0708661	0.0551181	0.0393701	0.015748	0.0393701	0.0314961	0.0393701	0.0393701	0	0.0551181	0.0708661	0.0551181	0.133858	0.0551181	0.0866142	0.0314961	0.023622	0.0708661
3N4W_GLHD	0.0338983	0.0847458	0.0423729	0.0423729	0.0338983	0.00847458	0.0508475	0.0508475	0.0762712	0.0254237	0.00847458	0.101695	0.0932203	0.059322	0.0762712	0.0677966	0.0338983	0.00847458	0.0254237	0.0762712
3N8B_GLHD	0.028169	0.0704225	0.0516432	0.056338	0.028169	0.0187793	0.0469484	0.028169	0.122066	0.0469484	0.00469484	0.107981	0.0985915	0.0798122	0.0422535	0.0610329	0.00938967	0.00938967	0.0328638	0.056338
3NAR_GLHD	0.00684932	0.0136986	0.0479452	0.123288	0.0684932	0.0547945	0.0205479	0.109589	0.10274	0.00684932	0.0136986	0.0410959	0.0684932	0.0136986	0.0342466	0.0616438	0.0684932	0	0.0958904	0.0479452
3O0L_GLHD	0.0254237	0.0169492	0.101695	0.0932203	0.0338983	0.0338983	0.0338983	0.059322	0.0508475	0.059322	0.0169492	0.0762712	0.0677966	0.0338983	0.0338983	0.0254237	0.059322	0	0.0932203	0.0847458
3O1F_GLHD	0.0420168	0.0840336	0.0756303	0.10084	0.0336134	0.0168067	0.0252101	0.0252101	0.10084	0.0336134	0	0.10084	0.10084	0.0252101	0.0504202	0.0672269	0	0.0168067	0	0.10084
3OFG_GLHD	0.035461	0.070922	0.0921986	0.120567	0.0496454	0.0425532	0.035461	0.0425532	0.0921986	0.0567376	0.0070922	0.0425532	0.0638298	0.0283688	0.0425532	0.070922	0.0070922	0	0.0283688	0.070922
3OP8_GLHD	0.0280374	0.0560748	0.0841121	0.0654206	0.0186916	0.0373832	0.046729	0.046729	0.0934579	0.0373832	0	0.0841121	0.0560748	0.046729	0.0560748	0.0373832	0.0280374	0	0.0747664	0.102804
3PC6_GLHD	0.0340909	0.0795455	0.0795455	0.0909091	0.0113636	0.0113636	0.0340909	0.0568182	0.125	0.0454545	0.0113636	0.0795455	0.0568182	0.0454545	0.0454545	0.0454545	0.0340909	0.0227273	0.0227273	0.0681818
3PD7_GLHD	0.0157068	0.0471204	0.0942408	0.0890052	0.026178	0.0575916	0.0575916	0.0837696	0.0680628	0.0680628	0.0209424	0.0575916	0.026178	0.0575916	0.0471204	0.0575916	0.0314136	0.0052356	0.0471204	0.0418848
3PES_GLHD	0.0283688	0.0638298	0.0780142	0.0921986	0.0283688	0.0567376	0.0638298	0.0496454	0.0921986	0.035461	0.0283688	0.0992908	0.0851064	0.0141844	0.0638298	0.0212766	0.0212766	0	0.0141844	0.0638298
3PGZ_GLHD	0.00826446	0.0413223	0.0330579	0.0909091	0.0495868	0.0413223	0.0578512	0.00826446	0.165289	0.0578512	0.0165289	0.0826446	0.0578512	0.0495868	0.0247934	0.0495868	0.0330579	0.0165289	0.0413223	0.0743802
3Q7T_GLHD	0.0535714	0.0625	0.0714286	0.0535714	0.0535714	0.0446429	0.0535714	0.0357143	0.0803571	0.0267857	0.0178571	0.125	0.0535714	0.0446429	0.0267857	0.0267857	0.0446429	0.0178571	0.0446429	0.0625
3S63_GLHD	0.0300752	0.0526316	0.0526316	0.0827068	0.037594	0.0601504	0.0601504	0.037594	0.0827068	0.075188	0.0075188	0.0977444	0.0676692	0.0300752	0.037594	0.037594	0.0526316	0.0150376	0.0225564	0.0601504
3SD2_GLHD	0.0263158	0.0789474	0.114035	0.0438596	0.0263158	0.0614035	0.0175439	0.0438596	0.0614035	0.00877193	0	0.0438596	0.105263	0.0438596	0.0614035	0.0701754	0.0526316	0.0175439	0.0614035	0.0614035
3SQF_GLHD	0.0224719	0.0224719	0.0898876	0.0561798	0.0337079	0.0449438	0.0674157	0.0337079	0.0786517	0.0561798	0.011236	0.0561798	0.0224719	0.0449438	0.168539	0.0224719	0.0224719	0	0.0674157	0.0786517
3T7Y_GLHD	0.0431034	0.0431034	0.0172414	0.0517241	0.0172414	0.0862069	0.0258621	0.0431034	0.163793	0.0603448	0	0.0517241	0.0431034	0.0603448	0.0775862	0.0603448	0.0172414	0.00862069	0.0862069	0.0431034
3TYR_GLHD	0.0283019	0.0188679	0.0849057	0.0471698	0.00943396	0.0283019	0.0188679	0.0849057	0.0660377	0.0283019	0	0.0754717	0.0849057	0.103774	0.0566038	0.103774	0.0377358	0.00943396	0.0660377	0.0471698
3U12_GLHD	0.0340909	0.125	0.0681818	0.0909091	0.0113636	0.0340909	0.0340909	0.0454545	0.0681818	0.0113636	0.0113636	0.113636	0.0909091	0.0454545	0.0909091	0.0795455	0	0	0.0340909	0.0113636
3U4V_GLHD	0.019802	0.0891089	0.029703	0.029703	0.029703	0.029703	0.039604	0.029703	0.108911	0.0990099	0.00990099	0.108911	0.0594059	0.039604	0.0594059	0.019802	0.049505	0.00990099	0.049505	0.0891089
3VC8_GLHD	0.0128205	0.0897436	0.025641	0.025641	0.0512821	0.0512821	0.0384615	0.0512821	0.0769231	0.025641	0	0.0897436	0.115385	0.0769231	0.0769231	0.0641026	0.0641026	0.025641	0.025641	0.0128205
3VK6_GLHD	0.0428571	0.157143	0	0.114286	0.0285714	0.0428571	0	0.0285714	0.128571	0.114286	0	0.0714286	0.0142857	0.0428571	0.0714286	0.0571429	0	0	0.0428571	0.0428571
3VVV_GLHD	0.0103093	0.134021	0.0618557	0.0721649	0.0103093	0.0206186	0.0618557	0.0927835	0.0618557	0.0309278	0.0206186	0.0927835	0.0309278	0.0412371	0.0412371	0.103093	0.0412371	0.0206186	0.0206186	0.0309278
3W5Z_GLHD	0.0103093	0.134021	0.0618557	0.0721649	0.0103093	0.0206186	0.0618557	0.0927835	0.0618557	0.0309278	0.0206186	0.0927835	0.0309278	0.0412371	0.0412371	0.103093	0.0412371	0.0206186	0.0206186	0.0309278
3X0T_GLHD	0.0666667	0.133333	0.0380952	0.047619	0.0190476	0.0190476	0.0285714	0.047619	0.0666667	0.00952381	0.0285714	0.152381	0.0380952	0.0380952	0.0285714	0.0952381	0.0190476	0.0190476	0.0571429	0.047619
3ZII_GLHD	0.025641	0.0512821	0.0641026	0.0512821	0.0769231	0.0769231	0.0897436	0.0641026	0.0512821	0.0512821	0	0.0512821	0.0641026	0.0384615	0.0641026	0.0512821	0.0384615	0.0128205	0.0512821	0.025641
3ZIT_GLHD	0.0291971	0.0145985	0.0875912	0.0729927	0.0364964	0.0218978	0.0437956	0.0218978	0.131387	0.0218978	0.0291971	0.0510949	0.0510949	0.0218978	0.080292	0.116788	0.0437956	0.0218978	0.0510949	0.0510949
3ZXC_GLHD	0.0222222	0.103704	0.037037	0.0592593	0.0592593	0.0148148	0.0444444	0.0592593	0.0962963	0.0518519	0.0148148	0.0962963	0.0740741	0.0444444	0.037037	0.111111	0	0.00740741	0.0518519	0.0148148
4AEQ_GLHD	0.0135135	0.0945946	0.0675676	0.0405405	0.0405405	0.027027	0.0405405	0.0135135	0.0810811	0.027027	0.0135135	0.0675676	0.0945946	0.0810811	0.135135	0.0405405	0.0405405	0	0.0135135	0.0675676
4ASV_GLHD	0.0288462	0.0288462	0.0480769	0.0192308	0.0769231	0.0480769	0.0865385	0.0480769	0.0865385	0.0673077	0.0192308	0.115385	0.0576923	0.0384615	0.0480769	0.0288462	0.0480769	0.00961538	0.0192308	0.0769231
4BHX_GLHD	0.010989	0.0769231	0.0549451	0.043956	0.032967	0.032967	0.021978	0.0989011	0.153846	0.0549451	0.010989	0.0549451	0.043956	0.0549451	0	0.142857	0.021978	0	0	0.0879121
4C7A_GLHD	0.0186916	0.121495	0.0186916	0.0934579	0.046729	0.046729	0.0373832	0.0934579	0.102804	0.0280374	0	0.0654206	0.0560748	0.0186916	0.0373832	0.0747664	0.046729	0	0.0747664	0.0186916
4CN0_GLHD	0.0307692	0.0461538	0.0384615	0.0692308	0.0230769	0.0384615	0.0846154	0.0307692	0.0769231	0.0307692	0.00769231	0.0692308	0.0461538	0.0615385	0.0923077	0.0769231	0.0384615	0.00769231	0.0307692	0.1
4DGF_GLHD	0.0212766	0.0531915	0.0851064	0.0319149	0.0851064	0.0425532	0.0106383	0	0.180851	0.0744681	0.0106383	0.12766	0.0851064	0.0212766	0.0957447	0.0106383	0.0212766	0.0106383	0.0212766	0.0106383
4DKK_GLHD	0.019802	0.0990099	0.049505	0.039604	0.00990099	0.0594059	0.039604	0.029703	0.0990099	0.0594059	0.029703	0.0990099	0.049505	0.0693069	0.0792079	0.0693069	0.049505	0	0.029703	0.019802
4DWF_GLHD	0.0272727	0.0272727	0.0727273	0.0636364	0.0454545	0.1	0.0181818	0.0545455	0.0818182	0.0727273	0.0181818	0.0545455	0.1	0.0545455	0.0454545	0.0727273	0.00909091	0	0.0272727	0.0545455
4EBG_GLHD	0.0330579	0.0495868	0.0165289	0.115702	0.00826446	0.0661157	0.0413223	0.0330579	0.173554	0.0413223	0.00826446	0.0826446	0.0495868	0.0247934	0.132231	0.0165289	0	0.0165289	0.0578512	0.0330579
4EFO_GLHD	0.0212766	0.0425532	0.0319149	0.0744681	0.0319149	0.0319149	0.0212766	0.0319149	0.159574	0.0531915	0	0.0744681	0.0319149	0.0319149	0.0319149	0.0744681	0	0.0744681	0.0851064	0.0957447
4EZF_GLHD	0.0384615	0.0673077	0.0288462	0.0576923	0.0480769	0.0673077	0.0192308	0.0384615	0.0865385	0.0576923	0.00961538	0.0673077	0.0480769	0.0769231	0.0480769	0.0576923	0.0769231	0.0288462	0.0576923	0.0192308
4FH0_GLHD	0.0384615	0.0673077	0.0288462	0.0576923	0.0480769	0.0673077	0.0192308	0.0384615	0.0865385	0.0576923	0.00961538	0.0673077	0.0480769	0.0769231	0.0480769	0.0576923	0.0769231	0.0288462	0.0576923	0.0192308
4G4K_GLHD	0.0350877	0.0877193	0.0438596	0.0701754	0.0438596	0.0263158	0.0614035	0.0438596	0.0789474	0.0526316	0	0.140351	0.0438596	0.0263158	0.0877193	0.0526316	0.0350877	0.00877193	0.0614035	0
4GR6_GLHD	0.0215054	0.0967742	0.0752688	0.0752688	0.0215054	0.0322581	0.0215054	0.0322581	0.129032	0.0215054	0.0215054	0.107527	0.0537634	0.0430108	0.0645161	0.0645161	0.0107527	0.0107527	0.0107527	0.0860215
4HAS_GLHD	0.0344828	0.0758621	0.0344828	0.103448	0.0413793	0.0275862	0.0206897	0.0551724	0.103448	0.0413793	0	0.0758621	0.0827586	0.0482759	0.0827586	0.0689655	0.00689655	0.00689655	0.0275862	0.062069
4HKG_GLHD	0.0344828	0.0758621	0.0344828	0.103448	0.0413793	0.0275862	0.0206897	0.0551724	0.103448	0.0413793	0	0.0758621	0.0827586	0.0482759	0.0827586	0.0689655	0.00689655	0.00689655	0.0275862	0.062069
4HW5_GLHD	0.0357143	0.0571429	0.0785714	0.0714286	0.0642857	0.05	0.05	0.0285714	0.0214286	0.0285714	0.0214286	0.0857143	0.0785714	0.0285714	0.05	0.0571429	0.0571429	0.0285714	0.05	0.0571429
4IRG_GLHD	0.0425532	0.0106383	0.0851064	0.0319149	0.0425532	0.0212766	0.0425532	0.0425532	0.117021	0.0851064	0.0319149	0.0851064	0.138298	0.0319149	0.0744681	0.0425532	0.0106383	0	0.0638298	0
4J5O_GLHD	0.0168067	0.0336134	0.0840336	0.0504202	0.0420168	0.0420168	0.0252101	0.0588235	0.0252101	0.0504202	0.0252101	0.0672269	0.0840336	0.0504202	0.0420168	0.0672269	0.0504202	0.00840336	0.0672269	0.109244
4L8I_GLHD	0.045977	0.0574713	0.0344828	0.045977	0.0344828	0.0804598	0.0689655	0.0574713	0.0804598	0.0229885	0	0.126437	0.045977	0.0229885	0.0344828	0.0689655	0.0344828	0.0114943	0.0574713	0.0689655
4L9D_GLHD	0.0212766	0.0425532	0.0106383	0.0638298	0	0.0319149	0.0638298	0.0531915	0.106383	0.0957447	0.0212766	0.170213	0.0638298	0.0638298	0.0425532	0.0212766	0.0106383	0	0.0212766	0.0957447
4LOW_GLHD	0.015748	0.0629921	0.0629921	0.0314961	0.0393701	0.00787402	0.0314961	0.0944882	0.0787402	0.015748	0.015748	0.0944882	0.141732	0.0472441	0.0314961	0.0314961	0.0393701	0	0.102362	0.0551181
4MAK_GLHD	0.0277778	0.0277778	0.0555556	0	0.0277778	0.0416667	0.0416667	0.0694444	0.0833333	0.0416667	0.0138889	0.125	0.0833333	0.0972222	0.0138889	0.0694444	0.0416667	0	0.0416667	0.0972222
4MHV_GLHD	0.0598291	0.111111	0.0769231	0.017094	0.017094	0.034188	0.00854701	0.034188	0.0512821	0.0512821	0.00854701	0.0769231	0.102564	0.0854701	0.0683761	0.102564	0.025641	0.017094	0.042735	0.00854701
4MMG_GLHD	0.0285714	0.114286	0.047619	0.0857143	0.0285714	0.0380952	0.0857143	0.0285714	0.0571429	0	0.00952381	0.0952381	0.104762	0.0666667	0.0857143	0.0380952	0.00952381	0.0285714	0.0380952	0.00952381
4MZ3_GLHD	0.0348837	0.0116279	0.0697674	0.0697674	0.0348837	0.0116279	0.0465116	0	0.104651	0.0930233	0	0.0697674	0.127907	0.0581395	0.127907	0.0465116	0	0	0.0930233	0
4NPF_GLHD	0.0843373	0.0843373	0.0240964	0.0120482	0.0240964	0.0240964	0.0240964	0	0.0843373	0.0240964	0	0.120482	0.0963855	0.0481928	0.0722892	0.0843373	0.0361446	0	0.0843373	0.0722892
4OE9_GLHD	0.0322581	0.0967742	0.0430108	0.0967742	0.0430108	0.0645161	0.0215054	0.0107527	0.0860215	0.0322581	0.0107527	0.129032	0.0752688	0.0322581	0.0752688	0.0537634	0	0.0107527	0.0537634	0.0322581
4OF6_GLHD	0.0128205	0.166667	0.166667	0.0897436	0.0128205	0.0641026	0.0128205	0.025641	0.0384615	0.0128205	0.0128205	0.0384615	0.025641	0.0769231	0.0512821	0.0128205	0.0128205	0.102564	0.0384615	0.025641
4OO4_GLHD	0.0172414	0.0862069	0.00862069	0.12069	0.0603448	0.0172414	0.0431034	0.0431034	0.103448	0.0258621	0	0.0603448	0.0689655	0.0344828	0.0344828	0.0603448	0.0258621	0.103448	0.0258621	0.0603448
4OYC_GLHD	0.00854701	0.102564	0.0598291	0.0940171	0.00854701	0.128205	0.102564	0.0769231	0.0769231	0.017094	0.00854701	0.042735	0.0512821	0.042735	0.017094	0.0598291	0.0598291	0	0.042735	0
4PEO_GLHD	0.0366972	0.0825688	0.12844	0.0183486	0.0550459	0.0183486	0.0275229	0.0733945	0.0642202	0.0458716	0.00917431	0.0642202	0.0917431	0.0275229	0.0550459	0.0458716	0.0642202	0.00917431	0.0733945	0.00917431
4PS2_GLHD	0.0263158	0.0657895	0.0131579	0.0789474	0.0657895	0.0921053	0.0131579	0.0263158	0.0657895	0.0263158	0.0263158	0.0657895	0.0131579	0.0789474	0.131579	0.144737	0.0131579	0.0131579	0.0131579	0.0263158
4PUH_GLHD	0.0291262	0.0970874	0.0582524	0.038835	0.0776699	0.0291262	0.0582524	0.0776699	0.0582524	0.038835	0.00970874	0.038835	0.0582524	0.0582524	0.0582524	0.0776699	0.0582524	0	0.0679612	0.00970874
4Q9B_GLHD	0.0114943	0.0689655	0.0689655	0.0574713	0.0114943	0.0229885	0.045977	0.0689655	0.091954	0.0229885	0	0.126437	0.0804598	0.0804598	0.0229885	0.0689655	0.0344828	0	0.091954	0.0229885
4RD7_GLHD	0.025974	0.142857	0.0519481	0.012987	0.038961	0.012987	0.0519481	0.0649351	0.038961	0.0519481	0.012987	0.0519481	0.0519481	0.0909091	0.0649351	0.0649351	0.025974	0.038961	0.038961	0.0649351
4RGD_GLHD	0	0.0619469	0.0619469	0.0442478	0.0353982	0.0353982	0.00884956	0.0530973	0.106195	0.0619469	0.0530973	0.0619469	0.0707965	0.0707965	0.0442478	0.0442478	0.0530973	0.00884956	0.0973451	0.0265487
4RO3_GLHD	0.0218579	0.0874317	0.0546448	0.0546448	0.0382514	0.0382514	0.0382514	0.0601093	0.0601093	0.0163934	0.010929	0.0710383	0.120219	0.0546448	0.0710383	0.0491803	0.0765027	0	0.0601093	0.0163934
4RT5_GLHD	0.0185185	0.0925926	0.101852	0.0277778	0.0833333	0.037037	0.0555556	0.037037	0.0555556	0.0648148	0	0.037037	0.0925926	0.101852	0.0185185	0.0277778	0.0277778	0.037037	0.0648148	0.0185185
4U88_GLHD	0	0.00980392	0.0686275	0.0392157	0.0392157	0.0588235	0.0196078	0	0.107843	0.0784314	0	0.0882353	0.0784314	0.0490196	0.147059	0.0490196	0.0490196	0.00980392	0.0392157	0.0686275
4UHT_GLHD	0.010101	0.030303	0.0606061	0.121212	0.010101	0.0909091	0.020202	0.010101	0.121212	0.0909091	0	0.10101	0.040404	0.030303	0.0707071	0.0707071	0.010101	0.0505051	0.020202	0.040404
4WWM_GLHD	0.0206186	0.0721649	0.0515464	0.0515464	0.0309278	0.0309278	0.0618557	0.0721649	0.0206186	0.0515464	0.0309278	0.113402	0.0309278	0.0824742	0.0206186	0.0515464	0.0412371	0.103093	0.0515464	0.0103093
4X1J_GLHD	0.0618557	0.123711	0.0103093	0.0206186	0.0309278	0.103093	0.0412371	0.0618557	0.0618557	0.0721649	0	0.0927835	0.0103093	0.0618557	0.0927835	0.0721649	0.0103093	0	0.0515464	0.0206186
4XIN_GLHD	0.0121951	0.0365854	0.121951	0.0609756	0.0487805	0	0.0487805	0.0609756	0.0853659	0.0365854	0	0.0365854	0.134146	0.0365854	0.0365854	0.0487805	0.0365854	0	0.121951	0.0365854
4Y0G_GLHD	0.0515464	0.0721649	0.0618557	0.0515464	0.0309278	0.0824742	0.0618557	0.0721649	0.134021	0.0412371	0.0515464	0.0824742	0.0515464	0.0206186	0.0515464	0.0309278	0	0.0206186	0.0206186	0.0103093
4YE7_GLHD	0.021978	0.032967	0.0769231	0.0549451	0.0879121	0.0659341	0.021978	0.010989	0.0769231	0.0879121	0.021978	0.0659341	0.0989011	0.0549451	0.043956	0.0659341	0.010989	0.043956	0.032967	0.021978
4Z02_GLHD	0.0163934	0.0655738	0.057377	0.0737705	0.0327869	0.0819672	0.0245902	0.0655738	0.114754	0.0819672	0.0163934	0.0655738	0.057377	0.0245902	0.057377	0.0163934	0.0245902	0.0409836	0.0491803	0.0327869
4Z4A_GLHD	0.0493827	0.0740741	0.0246914	0.0246914	0.0246914	0.037037	0.0493827	0.037037	0.0864198	0.0246914	0	0.0864198	0.123457	0.0493827	0.0987654	0.037037	0.0617284	0.0246914	0.0617284	0.0246914
4ZBH_GLHD	0.0222222	0.0518519	0.0888889	0.037037	0.037037	0.00740741	0.0592593	0.0222222	0.111111	0.0666667	0.00740741	0.103704	0.0888889	0.0740741	0.0814815	0.0592593	0.0222222	0.00740741	0.037037	0.0148148
5AEA_GLHD	0.0196078	0.0294118	0.0294118	0.0686275	0.0490196	0.0882353	0.0196078	0.0392157	0.137255	0.117647	0	0.0490196	0.0294118	0.0588235	0.0588235	0.0392157	0.0490196	0.0294118	0.0392157	0.0490196
5AQ0_GLHD	0.0111111	0.0444444	0.0888889	0.0555556	0.0111111	0.0555556	0.0222222	0.0444444	0.0888889	0.0444444	0.0333333	0.0888889	0.0888889	0.0555556	0.0777778	0.0777778	0.0333333	0	0.0444444	0.0333333
5B0G_GLHD	0.00775194	0.0852713	0.0465116	0.0775194	0.0232558	0.0155039	0.0542636	0.0697674	0.0852713	0.0310078	0.0155039	0.0775194	0.0775194	0.0775194	0.0387597	0.0620155	0.0232558	0.0155039	0.0852713	0.0310078
5CES_GLHD	0.0393701	0	0.0787402	0.0472441	0.0708661	0.0314961	0.0314961	0.0472441	0.0551181	0.0866142	0.0393701	0.0629921	0.0866142	0.0708661	0.110236	0.023622	0.023622	0.00787402	0.0314961	0.0551181
5CR8_GLHD	0.0175439	0.0263158	0.0438596	0.131579	0.0438596	0.0438596	0.0263158	0.0263158	0.0964912	0.0350877	0.0175439	0.0526316	0.0526316	0.0701754	0.0789474	0.0614035	0.0350877	0.0175439	0.0701754	0.0526316
5D22_GLHD	0.0235294	0.0235294	0.0823529	0.0235294	0.0941176	0.0117647	0.0235294	0.0117647	0.0470588	0.117647	0.0352941	0.141176	0.0823529	0.0470588	0.0941176	0.0352941	0.0470588	0.0352941	0.0235294	0
5F4C_GLHD	0.031746	0.0555556	0.0555556	0.0793651	0.00793651	0.0714286	0.0555556	0.047619	0.0714286	0.0714286	0	0.111111	0.0555556	0.0238095	0.0555556	0.103175	0.0714286	0.00793651	0.015873	0.00793651
5FEY_GLHD	0.0215054	0.0322581	0.0322581	0.0537634	0.0322581	0.0215054	0.0860215	0.0537634	0.139785	0.0752688	0.0107527	0.0967742	0.0537634	0.0967742	0.0537634	0.0430108	0.0322581	0	0.0430108	0.0215054
5FS4_GLHD	0.025	0.0916667	0.0333333	0.0666667	0.0166667	0.0416667	0.025	0.0833333	0.0833333	0.0416667	0.0166667	0.0833333	0.0833333	0.0166667	0.0583333	0.05	0.0666667	0.0166667	0.0916667	0.00833333
5H3V_GLHD	0.010989	0.010989	0.10989	0.0549451	0.10989	0.0879121	0.010989	0.0549451	0.043956	0.0659341	0	0.032967	0.0769231	0.032967	0.0549451	0.021978	0.043956	0.10989	0.032967	0.032967
5HSF_GLHD	0.0215054	0.0645161	0.0107527	0.0215054	0.0107527	0.0537634	0	0.0215054	0.0645161	0.0645161	0	0.193548	0.0967742	0.0752688	0.129032	0.0645161	0.0322581	0	0.0322581	0.0430108
5IO8_GLHD	0.0277778	0.037037	0.0648148	0.0833333	0.0462963	0.037037	0.0555556	0.037037	0.0740741	0.101852	0.00925926	0.0555556	0.037037	0.0277778	0.12037	0.0462963	0.0277778	0.00925926	0.0740741	0.0277778
5IO9_GLHD	0.0212766	0.0212766	0.0744681	0.0851064	0.0531915	0.0638298	0.0638298	0.0531915	0.0425532	0.0319149	0.0106383	0.0638298	0.106383	0.0531915	0.0425532	0.0531915	0.0425532	0.0212766	0.0744681	0.0212766
5IRI_GLHD	0.04	0.12	0.06	0.09	0.03	0.03	0.06	0.05	0.07	0.03	0	0.05	0.01	0.11	0.06	0.06	0.03	0.02	0.05	0.03
5J4F_GLHD	0.0196078	0.0392157	0.0784314	0.0588235	0.0490196	0.0490196	0.0392157	0.0196078	0.166667	0.0784314	0.00980392	0.0588235	0.0588235	0.0588235	0.0588235	0.0196078	0.0196078	0	0.0686275	0.0490196
5JMB_GLHD	0.0315789	0.105263	0.0631579	0.0421053	0.0421053	0.0526316	0.0210526	0.0315789	0.136842	0.0526316	0.0210526	0.0315789	0.0315789	0.0736842	0.0526316	0.0526316	0.0631579	0	0.0631579	0.0315789
5K6D_GLHD	0.048	0.096	0.056	0.072	0.088	0.016	0.032	0.032	0.096	0.056	0.024	0.048	0.08	0.056	0.048	0.064	0.016	0.008	0.024	0.04
5KO4_GLHD	0	0.0526316	0.0421053	0.0947368	0.0210526	0.0736842	0.0210526	0.0315789	0.0631579	0.0736842	0.0105263	0.0631579	0.115789	0.0842105	0.0631579	0.0947368	0.0210526	0.0105263	0.0315789	0.0315789
5LBD_GLHD	0.0102041	0.0918367	0.0714286	0.0204082	0.0306122	0.0612245	0.0102041	0.0510204	0.132653	0.0408163	0	0.0816327	0.0816327	0.0102041	0.0918367	0.0816327	0.0102041	0	0.0714286	0.0510204
5MKW_GLHD	0.00952381	0.0380952	0.0666667	0.0380952	0.0952381	0.047619	0.0190476	0.0190476	0.0285714	0.00952381	0.00952381	0.0952381	0.0857143	0.114286	0.104762	0.0571429	0.0571429	0.0761905	0.0190476	0.00952381
5OHO_GLHD	0.0533333	0.08	0.08	0.0533333	0.0533333	0.08	0	0.04	0.08	0	0	0	0.0933333	0.0933333	0.0933333	0.08	0.0266667	0	0.08	0.0133333
5T7A_GLHD	0.0306122	0.0816327	0.0612245	0.0306122	0.0408163	0.0408163	0.0408163	0.0306122	0.0612245	0.0510204	0.0306122	0.112245	0.0714286	0.0918367	0.0408163	0.0306122	0.0714286	0.0204082	0.0510204	0.0102041
5V77_GLHD	0.039604	0.0792079	0.0693069	0.049505	0.049505	0.049505	0.029703	0.019802	0.0594059	0.0792079	0	0.029703	0.0693069	0.049505	0.039604	0.0594059	0.029703	0.0990099	0.029703	0.0693069
5VJJ_GLHD	0.039604	0.0792079	0.0693069	0.049505	0.049505	0.049505	0.029703	0.019802	0.0594059	0.0792079	0	0.029703	0.0693069	0.049505	0.039604	0.0594059	0.029703	0.0990099	0.029703	0.0693069
5VZ3_GLHD	0.00826446	0.0991736	0.0743802	0.0413223	0.0991736	0.0247934	0.00826446	0.0330579	0.0495868	0	0.0247934	0.0247934	0.0413223	0.107438	0.0578512	0.0330579	0.0495868	0.0661157	0.0909091	0.0661157
5WO2_GLHD	0.0350877	0.0701754	0.0526316	0.0614035	0.0877193	0.0438596	0.0175439	0.0877193	0.114035	0.0263158	0.0526316	0.0175439	0.0438596	0.0701754	0.0350877	0.0877193	0.00877193	0	0.0877193	0
6B4A_GLHD	0	0.0840336	0.0672269	0.10084	0.0168067	0.0336134	0.00840336	0.0420168	0.0420168	0.0840336	0.0336134	0.0588235	0.0756303	0.0504202	0.0420168	0.0588235	0.0420168	0.0504202	0.0756303	0.0336134
1ARQ_MFHDF	0.0754717	0.0943396	0.0754717	0.0754717	0.0377358	0.0377358	0.0377358	0.0566038	0.0566038	0.113208	0.0188679	0.113208	0.0943396	0.0188679	0.0377358	0.0377358	0.0188679	0	0	0
1B2P_MFHDF	0.00840336	0.0168067	0.0756303	0.0252101	0.0504202	0.0588235	0.0252101	0.10084	0.092437	0.0336134	0.0252101	0.0252101	0.117647	0.0588235	0.0588235	0.0672269	0.0336134	0.0168067	0.0756303	0.0336134
1B8K_MFHDF	0	0.0840336	0.0672269	0.10084	0.0168067	0.0336134	0.00840336	0.0420168	0.0420168	0.0840336	0.0336134	0.0588235	0.0756303	0.0504202	0.0420168	0.0588235	0.0420168	0.0504202	0.0756303	0.0336134
1B98_MFHDF	0	0.0230769	0.138462	0.0538462	0.0307692	0.0230769	0.0153846	0.00769231	0.0538462	0.130769	0.0307692	0.0692308	0.1	0.0538462	0.123077	0.0153846	0.0153846	0.0461538	0.0615385	0.00769231
1BET_MFHDF	0	0.0747664	0.046729	0.0841121	0.00934579	0.0186916	0.0560748	0.046729	0.0280374	0.0560748	0.0280374	0.0560748	0.11215	0.0560748	0.0747664	0.046729	0.0186916	0.0560748	0.11215	0.0186916
1BFM_MFHDF	0.0289855	0.101449	0.057971	0.0289855	0.0289855	0	0.0144928	0	0.0724638	0.115942	0	0.101449	0.0289855	0.0724638	0.15942	0.144928	0	0	0.0289855	0.0144928
1CMB_MFHDF	0.0192308	0.0769231	0.0384615	0.0576923	0.0576923	0.0288462	0.0192308	0.0384615	0.0865385	0.0673077	0.0192308	0.134615	0.0384615	0.0480769	0.0769231	0.0673077	0.0288462	0.00961538	0.0576923	0.0288462
1CZ3_MFHDF	0.0178571	0.077381	0.077381	0.0654762	0.047619	0	0.0952381	0.0416667	0.0892857	0.077381	0.00595238	0.10119	0.113095	0.0297619	0.0297619	0.047619	0.0238095	0	0.0535714	0.00595238
1DBD_MFHDF	0.01	0.05	0.09	0.06	0.04	0.06	0.08	0.06	0.07	0.08	0.01	0.02	0.04	0.04	0.07	0.04	0.02	0.03	0.09	0.04
1DHM_MFHDF	0.0240964	0.0843373	0.0361446	0.0843373	0.0240964	0.0361446	0.0120482	0.0481928	0.0843373	0.0361446	0.0240964	0.0120482	0.060241	0.0481928	0.0361446	0.0843373	0.060241	0.0240964	0.144578	0.0361446
1ETY_MFHDF	0.0612245	0.0714286	0.0510204	0.0408163	0.0204082	0.102041	0.0204082	0.0816327	0.122449	0.0612245	0	0.0408163	0.102041	0.0612245	0.0510204	0.0102041	0.0408163	0	0.0612245	0
1F9F_MFHDF	0.0361446	0.060241	0.0722892	0.0843373	0.0240964	0.0240964	0.0120482	0.0361446	0.0843373	0.0722892	0.0240964	0.0240964	0.0481928	0.0481928	0.0240964	0.0722892	0.0481928	0.0120482	0.120482	0.0722892
1GVP_MFHDF	0.0229885	0.0689655	0.0804598	0.0804598	0.0689655	0.0689655	0.0344828	0.0229885	0.114943	0.045977	0	0.045977	0.091954	0.0344828	0.045977	0.045977	0.0574713	0.0114943	0.045977	0.0114943
1K3Y_MFHDF	0.0316742	0.108597	0.0452489	0.0542986	0.0542986	0.0226244	0.0452489	0.0316742	0.135747	0.0542986	0.00452489	0.0904977	0.0452489	0.0542986	0.0723982	0.0678733	0.0452489	0.00452489	0.0180995	0.0135747
1MKH_MFHDF	0.0280374	0.130841	0.0747664	0.00934579	0.0373832	0.00934579	0.0186916	0.0280374	0.140187	0.0560748	0	0.0654206	0.140187	0.0934579	0.0747664	0.0280374	0.046729	0	0.00934579	0.00934579
1MNT_MFHDF	0.0526316	0.0789474	0.0263158	0.0657895	0.0526316	0.0394737	0.0526316	0.0526316	0.0921053	0.0921053	0	0.0921053	0.0657895	0.0921053	0.0789474	0.0131579	0.0131579	0	0.0263158	0.0131579
1OHV_MFHDF	0.0275424	0.065678	0.0699153	0.0699153	0.0529661	0.0338983	0.0635593	0.0444915	0.0868644	0.0572034	0.0105932	0.065678	0.0508475	0.0572034	0.065678	0.065678	0.0233051	0.0211864	0.0381356	0.029661
1PD3_MFHDF	0.0172414	0.0517241	0.0344828	0.0172414	0	0.12069	0.0689655	0.0517241	0.12069	0.103448	0.0344828	0.172414	0.0344828	0	0.0172414	0.0862069	0	0	0.0517241	0.0172414
1Q2H_MFHDF	0.0144928	0.0144928	0.057971	0.0434783	0.057971	0.0289855	0.115942	0.0289855	0.057971	0.0869565	0.0144928	0.0434783	0.0724638	0.0869565	0.15942	0	0.0144928	0.0289855	0.0144928	0.057971
1R6R_MFHDF	0.05	0.1	0.07	0.03	0.04	0.04	0.06	0.07	0.13	0.16	0.01	0.02	0.04	0.01	0.05	0.06	0	0	0.06	0
1R8P_MFHDF	0.0246914	0.0987654	0.037037	0.0864198	0.0246914	0.037037	0.037037	0.0246914	0.0740741	0.037037	0.037037	0.0123457	0.0740741	0.037037	0.037037	0.0617284	0.037037	0.0246914	0.135802	0.0617284
1RFY_MFHDF	0.0294118	0.0490196	0.0588235	0.0294118	0.0588235	0.0392157	0.0196078	0.0294118	0.117647	0.0588235	0	0.0882353	0.0588235	0.0392157	0.0784314	0.0980392	0.0196078	0.00980392	0.0882353	0.0294118
1UUJ_MFHDF	0.0340909	0.113636	0.0681818	0.0681818	0.0113636	0.0340909	0.0227273	0.0454545	0.125	0.0568182	0.0113636	0.147727	0.0454545	0.0454545	0.0795455	0.0227273	0.0454545	0	0.0227273	0
1UWO_MFHDF	0.043956	0.0879121	0.043956	0.043956	0	0.032967	0.0769231	0.032967	0.0879121	0.010989	0	0.175824	0.0769231	0.0769231	0.0549451	0.032967	0.010989	0.021978	0.032967	0.0549451
1VCQ_MFHDF	0.0201342	0.0939597	0.114094	0.0604027	0.0469799	0.0134228	0.0268456	0.033557	0.0402685	0.0402685	0.0201342	0.0604027	0.100671	0.0536913	0.0805369	0.0402685	0.033557	0.0201342	0.0536913	0.0469799
1X93_MFHDF	0.0363636	0.0909091	0.0545455	0.109091	0	0.0363636	0.0181818	0.0181818	0.0727273	0.0727273	0	0.127273	0.0363636	0.0181818	0.0545455	0.0545455	0.0727273	0	0.0181818	0.109091
1YGT_MFHDF	0.036036	0.0720721	0.0630631	0.0630631	0.00900901	0.045045	0.018018	0.0720721	0.036036	0.018018	0.027027	0.0630631	0.0990991	0.0630631	0.0540541	0.0630631	0.045045	0.036036	0.0990991	0.018018
2AY0_MFHDF	0.0517241	0.0344828	0.0344828	0.0517241	0.0344828	0.0344828	0.0172414	0.0172414	0.0862069	0.0689655	0.0172414	0.0689655	0.0172414	0.0689655	0.0689655	0.0689655	0.0172414	0	0.12069	0.12069
2AYE_MFHDF	0.0229885	0.0689655	0.0229885	0.091954	0.0574713	0.0574713	0.0574713	0.0344828	0.091954	0.0574713	0.0229885	0.0344828	0.0574713	0.0229885	0.045977	0.0574713	0.0229885	0.0229885	0.0574713	0.091954
2B9D_MFHDF	0.0384615	0.0384615	0	0.0576923	0.0384615	0.0769231	0	0.0192308	0.173077	0.0769231	0	0.0576923	0.0961538	0.0192308	0.0961538	0.0384615	0.0384615	0.0769231	0.0384615	0.0192308
2C9V_MFHDF	0	0.0718954	0.163399	0.0653595	0.0326797	0.0196078	0.0261438	0.0457516	0.0588235	0.0261438	0.00653595	0.0653595	0.0915033	0.0718954	0.0653595	0.0588235	0	0.0261438	0.0522876	0.0522876
2CPG_MFHDF	0.0888889	0.133333	0.0444444	0.111111	0	0.0222222	0	0.0444444	0.133333	0.0666667	0	0.133333	0.0444444	0	0.0666667	0.0444444	0.0222222	0	0.0444444	0
2GSR_MFHDF	0.0193237	0.0628019	0.057971	0.0531401	0.0676329	0.057971	0.0434783	0.0434783	0.130435	0.0531401	0.00966184	0.057971	0.057971	0.0531401	0.0724638	0.0338164	0.0483092	0.0193237	0.0386473	0.0193237
2HJD_MFHDF	0.0392157	0.0392157	0.0686275	0.0588235	0.0294118	0.0490196	0.0294118	0.0294118	0.137255	0.0392157	0	0.0686275	0.0784314	0.0686275	0.0882353	0.0784314	0.00980392	0	0.0588235	0.0294118
2IJK_MFHDF	0.015873	0.047619	0.047619	0.047619	0	0.047619	0.031746	0.047619	0.15873	0.0634921	0	0.111111	0	0.111111	0.0952381	0.031746	0.015873	0.031746	0.0634921	0.031746
2K29_MFHDF	0.0566038	0.0566038	0.0566038	0.0754717	0.0377358	0.0188679	0.0188679	0.0377358	0.150943	0.0754717	0	0.0943396	0.0188679	0.0566038	0.0943396	0.0566038	0.0377358	0	0.0377358	0.0188679
2MMV_MFHDF	0.0348837	0.0930233	0.0348837	0.0581395	0.0465116	0.0697674	0.0232558	0	0.0930233	0.0581395	0	0.0930233	0.0930233	0.0465116	0.0813953	0.0465116	0.0465116	0	0.0465116	0.0348837
2ODK_MFHDF	0.0224719	0.0337079	0.0674157	0.0674157	0.0674157	0.0561798	0.0224719	0	0.101124	0.134831	0.0224719	0.0898876	0.0786517	0.0337079	0.11236	0.0337079	0	0.011236	0.0224719	0.0224719
2W1O_MFHDF	0.0142857	0.0857143	0.114286	0.1	0.0285714	0.0142857	0	0.0571429	0.1	0.0285714	0	0.0428571	0.0714286	0.0857143	0.128571	0.1	0.0285714	0	0	0
2YAL_MFHDF	0.0243902	0.146341	0.0487805	0.097561	0.0243902	0.0731707	0.0487805	0	0.0487805	0.0731707	0.0487805	0.121951	0.0487805	0.0731707	0.0487805	0.0243902	0.0243902	0	0.0243902	0
3A0E_MFHDF	0.00909091	0.0272727	0.118182	0.1	0.0454545	0.0454545	0.0181818	0.0909091	0.1	0.0363636	0.0272727	0.0181818	0.109091	0.0454545	0.0272727	0.0363636	0.0454545	0.0181818	0.0545455	0.0272727
3DZW_MFHDF	0.0183486	0.0183486	0.100917	0.0550459	0.0366972	0.0275229	0.0183486	0.119266	0.0825688	0.0550459	0.0275229	0.0366972	0.0825688	0.0642202	0.0366972	0.0550459	0.0550459	0.0275229	0.0642202	0.0183486
3FRW_MFHDF	0.0373832	0.0934579	0.046729	0.0747664	0	0.00934579	0.046729	0.0560748	0.0841121	0.0560748	0	0.130841	0.046729	0.046729	0.0560748	0.046729	0.0373832	0.0280374	0.0934579	0.00934579
3G1C_MFHDF	0.0288462	0.0673077	0.0384615	0.0673077	0	0.0384615	0.0480769	0.0673077	0.115385	0.0673077	0	0.105769	0.0480769	0.0769231	0.0673077	0.0480769	0.0384615	0.00961538	0.0576923	0.00961538
3G5O_MFHDF	0.0185185	0.0462963	0.0740741	0.0555556	0.0555556	0.0462963	0.0185185	0.0185185	0.0648148	0.0555556	0.0185185	0.0833333	0.0462963	0.101852	0.12037	0.0833333	0.0277778	0	0.0555556	0.00925926
3HS2_MFHDF	0.0172414	0.0517241	0.0517241	0.0689655	0.0172414	0.0172414	0.0517241	0.0689655	0.0517241	0.0862069	0	0.137931	0.0862069	0.0172414	0.155172	0.0517241	0.0172414	0	0.0517241	0
3KOR_MFHDF	0.0420168	0.0336134	0.0588235	0.092437	0.00840336	0.0672269	0.0252101	0.0420168	0.092437	0.0588235	0.00840336	0.0840336	0.0336134	0.0504202	0.0672269	0.0672269	0.0336134	0.0168067	0.0672269	0.0504202
3KZ5_MFHDF	0.0384615	0.0961538	0.0576923	0.0769231	0.0769231	0.0192308	0.0192308	0.0192308	0.0961538	0.0576923	0	0.0961538	0.0576923	0.0384615	0.0769231	0.0576923	0.0192308	0.0192308	0.0384615	0.0384615
3L32_MFHDF	0.0444444	0.0222222	0.0444444	0.0888889	0	0.0888889	0.0666667	0.0666667	0.0888889	0.0666667	0.0222222	0.0666667	0.155556	0.0222222	0	0.0666667	0.0444444	0	0.0444444	0
3M1E_MFHDF	0.0319149	0.0531915	0.0425532	0.0638298	0.0425532	0.0744681	0.0425532	0.0212766	0.106383	0.0638298	0	0.0851064	0.0638298	0.0212766	0.0638298	0.0531915	0.0319149	0.0106383	0.0425532	0.0851064
3SSI_MFHDF	0.0265487	0.0176991	0.0973451	0.079646	0.0707965	0.00884956	0.0265487	0.0265487	0.079646	0.0353982	0.00884956	0.0442478	0.115044	0.0530973	0.159292	0	0.0265487	0.0353982	0.0707965	0.0176991
3WRP_MFHDF	0.037037	0.037037	0.0462963	0.0555556	0.037037	0.0648148	0.00925926	0.0462963	0.175926	0.0833333	0.0185185	0.111111	0.0462963	0.037037	0.0925926	0.0277778	0.0185185	0	0.037037	0.0185185
4CFG_MFHDF	0.0126984	0.0761905	0.0333333	0.0761905	0.068254	0.0539683	0.0365079	0.0380952	0.0936508	0.0460317	0.0111111	0.0777778	0.0634921	0.0333333	0.0793651	0.0349206	0.0269841	0.0460317	0.0555556	0.0365079
4EC7_MFHDF	0.0172414	0.0862069	0.0517241	0.0689655	0.0344828	0.00862069	0.0344828	0.0862069	0.0258621	0.0258621	0.0258621	0.0775862	0.0862069	0.0517241	0.0431034	0.0517241	0.0258621	0.0517241	0.112069	0.0344828
4EFV_MFHDF	0.017094	0.0854701	0.0512821	0.0854701	0.034188	0.017094	0.0598291	0.042735	0.025641	0.042735	0.025641	0.034188	0.102564	0.0598291	0.0769231	0.0512821	0.017094	0.0512821	0.0854701	0.034188
4H3O_MFHDF	0.00952381	0.00952381	0.104762	0.142857	0.00952381	0.0380952	0.0190476	0.0761905	0.0857143	0.0285714	0.0285714	0.0285714	0.0571429	0.0952381	0.0380952	0.0761905	0.0571429	0.0190476	0.047619	0.0285714
4ME7_MFHDF	0.0638298	0.0319149	0.0425532	0.117021	0.0106383	0.0106383	0.0106383	0.0531915	0.0744681	0.117021	0	0.138298	0.0638298	0.0212766	0.0957447	0.0425532	0.0212766	0.0106383	0.0531915	0.0212766
4Q14_MFHDF	0.0359712	0.0143885	0.100719	0.057554	0.057554	0.0215827	0.028777	0.0143885	0.107914	0.057554	0.00719424	0.0719424	0.0503597	0.0503597	0.0935252	0.0359712	0.0431655	0	0.0719424	0.0791367
4RP3_MFHDF	0.0102041	0.0918367	0.0102041	0.0714286	0.0204082	0.0816327	0.0408163	0	0.122449	0.0714286	0.0102041	0.0918367	0.0306122	0.0714286	0.102041	0.0918367	0.0204082	0	0.0408163	0.0204082
4WR4_MFHDF	0.045082	0.0901639	0.0778689	0.0491803	0.057377	0.0286885	0.0368852	0.0245902	0.110656	0.0409836	0.0163934	0.0655738	0.0409836	0.0778689	0.0491803	0.0532787	0.0327869	0.0163934	0.0327869	0.0245902

## Sheet: S4. Disorder_Predictors
Method	%
IUPred long	0.0827
IUPred sort	0.1073
Espritz	0.1903
VSL2b	0.3016
GlobPlot	0.0262
MobiDB Lite	0.0486
Metadisorder	0.2136

## Sheet: S5. Interface_AA_composition
	MFHD_mean	GLHD_mean	MFHD_std	GLHD_std
TRP	0.009828	0.020479	0.024223	0.034814
TYR	0.040272	0.061569	0.042806	0.065885
PHE	0.066909	0.065572	0.060468	0.064433
GLN	0.024006	0.0275	0.030864	0.038211
ASN	0.019338	0.023752	0.030554	0.034199
THR	0.054085	0.040877	0.059247	0.047916
SER	0.045707	0.031267	0.047528	0.045753
MET	0.034716	0.017594	0.04268	0.036092
ILE	0.104528	0.118621	0.064684	0.084732
VAL	0.120086	0.117052	0.075543	0.089872
ALA	0.077439	0.062021	0.058122	0.067018
LEU	0.169456	0.138338	0.085017	0.090119
HIS	0.020393	0.026573	0.027317	0.039402
ASP	0.035307	0.02713	0.038312	0.036481
ARG	0.041435	0.043687	0.048772	0.048859
LYS	0.033666	0.05	0.039823	0.052968
GLU	0.036787	0.041443	0.039022	0.055844
PRO	0.019078	0.021965	0.027171	0.032949
GLY	0.027996	0.025957	0.036065	0.036862
CYS	0.018968	0.028347	0.032907	0.050412

## Sheet: S6. RSAMP_AA_composition
	MFHD_mean	GLHD_mean	MFHD_std	GLHD_std
TRP	0.005556	0.006422	0.043033	0.07141
TYR	0.012222	0.017661	0.055563	0.11037
PHE	0.038702	0.025368	0.11237	0.124127
GLN	0.000725	0.004066	0.005613	0.033597
ASN	0.003333	0.010092	0.02582	0.060634
THR	0.028333	0.019554	0.08735	0.110291
SER	0.063502	0.030603	0.172984	0.13865
MET	0.039722	0.006422	0.105145	0.070253
ILE	0.07151	0.066302	0.127878	0.204423
VAL	0.087639	0.059313	0.186165	0.184563
ALA	0.207669	0.071571	0.323634	0.223021
LEU	0.097005	0.054373	0.171301	0.164895
HIS	0.021558	0.010398	0.132544	0.080602
ASP	0.01378	0.013456	0.058817	0.089216
ARG	0.001449	0.006163	0.011226	0.041593
LYS	0.008333	0.002294	0.06455	0.033864
GLU	0.003333	0.009251	0.02582	0.076684
PRO	0.04276	0.046218	0.147199	0.189986
GLY	0.148641	0.117826	0.230764	0.262789
CYS	0.020894	0.014392	0.087681	0.076201
